1 **Cell type specific gene expression profiling reveals a role for the complement component**

2 **C3A in neutrophil migration to tissue damage**

3 Ruth A. Houseright<sup>1</sup>, Emily E. Rosowski<sup>2</sup>, Pui Ying Lam<sup>3</sup>, Sebastien JM Tazuin<sup>4</sup>, Oscar

4 Mulvaney<sup>5</sup>, Colin N. Dewey<sup>6</sup>, David Bennin<sup>7</sup>, and Anna Huttenlocher<sup>7,8\*</sup>

5 <sup>1</sup>Department of Pathobiological Sciences, University of Wisconsin-Madison

6 <sup>2</sup>Department of Biological Sciences, Clemson University

7 <sup>3</sup>Department of Pharmacology and Toxicology, University of Utah

8 <sup>4</sup>Department of Biology, Utah Valley University

9 <sup>5</sup>Department of Genetics, University of Wisconsin-Madison

10 <sup>6</sup>Department of Biostatistics and Medical Informatics, University of Wisconsin-Madison

11 <sup>7</sup>Department of Medical Microbiology and Immunology, University of Wisconsin-Madison

12 <sup>8</sup>Department of Pediatrics, University of Wisconsin-Madison

13 \*Corresponding author: [huttenlocher@wisc.edu](mailto:huttenlocher@wisc.edu)

14 **Abstract**

15 Following acute injury, leukocytes rapidly infiltrate into tissues. For efficient recruitment,  
16 leukocytes must sense and respond to signals from both from the damaged tissue and from one  
17 another. However, the cell type specific transcriptional changes that influence leukocyte  
18 recruitment and wound healing have not been well characterized. In this study, we performed a  
19 large-scale translating ribosome affinity purification (TRAP) and RNA sequencing screen in  
20 larval zebrafish to identify genes differentially expressed by neutrophils, macrophages, and  
21 epithelial cells in the context of wounding. We identified the complement pathway and *c3a.1*,  
22 homologous to the C3A component of human complement, as significantly increased in  
23 neutrophils in response to a wound. We report that *c3a.1*<sup>-/-</sup> zebrafish larvae have impaired  
24 neutrophil responses to both tail wounds and localized bacterial infections, as well as increased  
25 susceptibility to infection due to a neutrophil-intrinsic function of C3A. We further show that C3A  
26 enhances migration of human primary neutrophils to IL-8 and that *c3a.1*<sup>-/-</sup> larvae have impaired  
27 neutrophil migration *in vivo*, and a decrease in neutrophil directed migration speed early after  
28 wounding. Together, our findings suggest a role for C3A in mediating efficient neutrophil  
29 migration to damaged tissues and support the power of TRAP to identify cell-specific changes in  
30 gene expression associated with wound-associated inflammation.

31

## 32 **Introduction**

33 Acute tissue injury is characterized by a rapid influx of leukocytes, both neutrophils and  
34 macrophages, into the wound microenvironment, followed by inflammatory resolution and  
35 wound healing(1). This initial recruitment of leukocytes to the wound is of critical importance;  
36 neutrophils, the most abundant cell type and the first responders to tissue damage, limit  
37 infection at the wound site (2, 3), while macrophages remove debris that would otherwise  
38 impede the repair process (4, 5).

39 In order for efficient recruitment to the wound to occur, leukocytes must sense and respond to a  
40 complex milieu of signals, both from the damaged tissue itself and from one another. For  
41 example, early after wounding, the damaged tissue produces a burst of hydrogen peroxide (6).  
42 This cue, originating from epithelial cells, induces signaling changes within neutrophils, including  
43 activation of the Src family kinase Lyn, which is necessary for efficient early neutrophil  
44 recruitment to the wound (7). Integration of these early wound signals is important; for example,  
45 interrupting ROS signaling for as little as 1 hour post-wounding (1hpw) can impair healing and  
46 regeneration in a larval zebrafish model 3 days later, suggesting there are transcriptional  
47 changes induced by this early signal (8).

48 Zebrafish represent a strong *in vivo* system to answer these questions, as they have functioning  
49 cellular and noncellular arms of the innate immune system that are largely conserved to those of  
50 humans, including neutrophils (9-11), macrophages (11-13), and the complement system (14,  
51 15). Zebrafish have high fecundity, which increases the statistical power of experiments, and  
52 are thus an attractive model for use in large-scale genetic and drug screens. Further, zebrafish  
53 are highly amenable to live imaging of leukocyte migration in response to inflammatory stimuli  
54 (16).

55 We have previously reported the use of translating ribosome affinity purification (TRAP) to  
56 detect changes in gene expression in specific cell types resulting from heat shock in zebrafish  
57 (17). However, this method has not, to our knowledge, been used to detect cell type-specific  
58 differential gene expression in response to wounding. Using this method, we detected  
59 upregulation of complement system components in cells upon wounding, including c3a.

60 As a non-cellular arm of the innate immune system, the complement system has long been  
61 recognized to play an important role in mediating leukocyte function. As early as 1899, Paul  
62 Ehrlich recognized that immune cells express receptors that can bind the heat-labile,  
63 antimicrobial component of fresh serum, which now known to be complement (18). Most of the  
64 proteins of the complement system are synthesized by the liver in humans and circulate in blood  
65 plasma(19). However, significant quantities of complement proteins are also produced by tissue  
66 macrophages and dendritic cells (20-24), blood monocytes and neutrophils (25-30), mast cells  
67 (31, 32), and the epithelial cells of the gastrointestinal tract (33, 34), amongst others (35). The  
68 relative contribution of complement generated by each these sources has not been fully  
69 established. Further, activation of complement via either the classical, alternative, or mannose-  
70 binding lectin pathways results in a cascade of proteolytic cleavages of complement  
71 components, converging at the hydrolysis and activation of component C3 to C3A and C3B.  
72 C3B subsequently binds to other complement pathway proteins to form C5 convertase, which  
73 cleaves component C5 to C5A and C5B (19). While both C3B and C5B play important roles in  
74 antimicrobial defense, and C5A is known to be a powerful chemoattractant for neutrophils (19),  
75 C3A remains a relatively under-studied complement protein, and its specific role in leukocyte  
76 recruitment in the absence of infection is unclear.

77 The complement system is evolutionarily old, with elements of the cascade present in species  
78 from protostomes to mammals (36). Zebrafish express complement proteins highly conserved  
79 to human C3A and C3B (37); however, unlike humans, zebrafish express multiple forms of C3



80 that are encoded on different genes (14, 15). While in humans, the full-length complement  
81 component C3 is cleaved during complement activation to produce C3A and C3B (19),  
82 zebrafish C3A and C3B are encoded on different genetic loci, and indeed, different  
83 chromosomes (38). The possibility of manipulating C3A expression at the genetic level,  
84 independent of C3B expression, without disrupting the expression of important downstream  
85 complement components such as C5A, makes the zebrafish an attractive model for studying the  
86 specific effects C3A on leukocyte responses to tissue damage.

87 In this work, we report that TRAP-RNAseq of larval zebrafish identifies genes differentially  
88 expressed in neutrophils, macrophages, and epithelial cells in response to wounds. Our data  
89 identify upregulation of the complement pathway in all cell types, with specific, statistically  
90 significant upregulation of *c3a.1*, homologous to the C3A component of human complement, in  
91 neutrophils. We find that *c3a.1* plays an important role in neutrophil recruitment, as mutation of  
92 *c3a.1* results in impaired neutrophil recruitment to wounds. Neutrophil recruitment to and  
93 survival of localized bacterial infections is also impaired in *c3a.1*<sup>-/-</sup> larvae. We find that these  
94 defects in neutrophil recruitment are likely due to decreased neutrophil migratory speed in the  
95 early post-wounding period. We further show that, *in vitro*, C3A does not serve as a direct  
96 chemoattractant for human primary neutrophils, but instead sensitizes neutrophils to respond to  
97 IL-8, suggesting a role for C3A in priming neutrophils to respond to other inflammatory cues.

## 98 **Methods**

### 99 *Zebrafish lines, maintenance, and genotyping*

100 All zebrafish were maintained according to protocols approved by the University of Wisconsin-  
101 Madison Institutional Animal Care and Use Committee, as described previously(39). Previously  
102 published zebrafish lines were used (**Supplemental Table 1**). Larvae were anesthetized using  
103 0.2 mg/mL tricaine before any experimentation. Zebrafish containing the mutant *c3a.1* allele

104 sa31241 were isolated through the Sanger Zebrafish Mutation Project, Wellcome Sanger  
105 Institute, and obtained from the Zebrafish International Resource Center (ZIRC). This allele will  
106 be referred to as *c3a.1<sup>-/-</sup>* herein. The sa31241 point mutation was detected by restriction  
107 fragment length polymorphism (RFLP) analysis. DNA was isolated in 50mM NaOH, the  
108 mutated region amplified with GoTaq (Promega) (**Supplemental Table 2**), and a restriction  
109 enzyme (DraI, NEB) directly targeting the mutant copy, but not the wild-type copy, was directly  
110 added with buffer. Digests were incubated overnight and run on a 2% agarose gel to evaluate  
111 the presence of mutant and/or wild-type bands.

#### 112 *Purification of mRNA from TRAP zebrafish larvae and RNA sequencing*

113 3 dpf *Tg(lyz:EGFP-L10a)*, *Tg(mpeg1:EGFP-L10a)*, or *Tg(krt4:EGFP-L10a)* (17) zebrafish  
114 larvae were anesthetized using 0.2 mg/mL tricaine and subjected to multiple tail fin wounds  
115 using a 33 gauge needle (**Fig. 1A**). A previously-published protocol for TRAP mRNA  
116 purification from zebrafish (17) was performed, with slight modifications. Briefly, a QIAshredder  
117 (Quiagen) was used to homogenize the larvae prior to immunoprecipitation. mRNA was  
118 isolated from immunoprecipitated polysomes from 50 pooled wounded fish or unwounded  
119 controls using TRIzol reagent (Invitrogen). 4 paired replicates were collected. RNA quality and  
120 concentration was assessed on Agilent RNA PicoChip and samples with a concentration <200  
121 pg/μl were concentrated in a SpeedVac. As RNA concentrations were low, library prep was  
122 done with the NuGEN Ovation Single Cell RNA-Seq System with 20 cycles of amplification.  
123 Libraries were then checked by QuBit and an AATI Fragment Analyzer for concentration and  
124 fragment size. Adaptors with barcodes were used and samples were sequenced on an Illumina  
125 HiSeq with an average of 8 samples per lane. Sequencing generated 27.5 million single end  
126 reads per sample on average. Gene-level read counts were estimated using RSEM v1.2.20(40)  
127 and Bowtie v1.1.1 (41) with the Ensembl v83 annotation of the GRCz10 assembly of the  
128 zebrafish genome. One *Tg(lyz:EGFP-L10a)* wounded sample was removed from the analysis

129 during quality control assessments because it clustered most closely with other samples  
130 sequenced at the same time that had been generated via a different protocol.

131 Differentially expressed genes identified by RNA-seq were called using the DESeq2 R package  
132 (42). The design formula for the generalized linear model used with DESeq2 was “~ replicate +  
133 condition” where “condition” was the combination of cell type and treatment for each sample.  
134 Statistical testing for differential expression within each cell type was performed using the Wald  
135 test implemented in the DESeq2 package. Translating RNAs with at least a 2-fold change in  
136 their relative abundance with a Benjamini-Hochberg corrected  $P$  value (FDR)  $\leq 0.05$  were  
137 considered statistically significant.

138 Human homologs of zebrafish genes were extracted from Ensembl using the BioMart tool. Gene  
139 Set Enrichment Analysis(43, 44) was performed by comparing gene expression data mapped to  
140 these human homologs to Hallmark gene sets (v6.2) from the Molecular Signatures Database  
141 (Broad Institute)(45). The gsea3 java release was run using all default settings. Heatmaps were  
142 generated with Multiple Experiment Viewer (MeV) and Venn diagrams were generated and  
143 overlaps determined by BioVenn(46).

#### 144 *RT-qPCR*

145 RNA was extracted from approximately 50 pooled, 3 dpf *c3a.1<sup>+/+</sup>* or *c3a.1<sup>-/-</sup>* larvae using TRIzol  
146 reagent (Invitrogen). cDNA was then synthesized using SuperScript III RT and oligo-dT  
147 (Invitrogen). Using this cDNA as a template, quantitative PCR (qPCR) with FastStart Essential  
148 DNA Green Master (Roche) and a LightCycler96 (Roche) was performed. Fold changes in  
149 gene expression over control conditions, normalized to *ef1a*, were calculated from Cq values  
150 (47). Primers used to amplify *c3a* orthologues(48), and *ef1a*(49) have been described  
151 previously. Due to high identity percentage, *c3a.2-3* and *c3a.7-8* were amplified and analyzed

152 together, as previously described (48). Primer sequences used in this study can be found in  
153 **Supplemental Table 2.**

#### 154 *Tail transection*

155 *C3a.1<sup>+/-</sup>* adults were in-crossed. 3 dpf larvae were wounded by tail transection using a no. 10  
156 Feather surgical blade. To visualize neutrophils in the wound microenvironment, the larvae  
157 were fixed at 2 hpw or 8 hpw in 4% paraformaldehyde in 1X PBS overnight at 4°C. Sudan  
158 Black B staining was performed as described previously (50). Fixed larvae were imaged using  
159 a zoomscope (EMS3/SyCoP3; Zeiss; Plan-NeoFluar Z objective) and then genotyped as above.  
160 For macrophage quantification, *c3a.1<sup>+/-</sup>* adults carrying a *mpeg1:GFP* transgene (13) were in-  
161 crossed. At 3 dpf, larvae were pre-screened for fluorescence on a zoomscope. Tail wounding  
162 was then performed as described above and the larvae were fixed in 1.5% formaldehyde  
163 overnight at 4°C. Fixed larvae were imaged using a zoomscope and genotyped as above. All  
164 image analysis was performed using Zen 2012 (blue edition, Carl Zeiss), blinded to genotype.

#### 165 *Pseudomonas* infections

166 3 dpf *c3a.1<sup>+/+</sup>* or *-/-* larvae on a WT AB or *Tg(mpx:mcherry-2A-rac2<sup>D57N</sup>)* background (51) were  
167 infected with *P. aeruginosa* PAK (pMF230, expresses GFP) as previously described (52, 53).  
168 PAK (pMF230) was a gift of Dara Frank (Medical College of Wisconsin). A single colony was  
169 inoculated overnight in LB. In the morning, the culture was diluted 1:5 and grown for an  
170 additional 1.25 hours. The OD was measured (600nm). The final inoculum was prepared by  
171 pelleting the bacterial suspension by centrifugation and resuspending the bacteria to achieve  
172 the desired bacterial density in 1X PBS containing 10% glycerol and 2% PVP-40 (to prevent  
173 needle clogging). Phenol red dye was added at a final concentration of 0.5% to visualize  
174 success of the injection. To monitor CFUs, the injection product was plated on LB and  
175 incubated overnight. Injected CFUs are noted in the figure legends. For survival experiments,

176 infected larvae were placed into individual wells of a 96 well plate and survival was monitored  
177 daily for 5 dpi. For neutrophil recruitment experiments, larvae were fixed at 1 hpi or 6 hpi in 4%  
178 paraformaldehyde in 1X PBS overnight at 4°C. Sudan Black B staining was performed as  
179 described previously (50), and injection success was further confirmed by visualization of GFP-  
180 positive bacteria in the otic vesicle on a spinning disk confocal microscope (CSU-X, Yokogawa)  
181 as described below, without mounting in agarose. Imaging of the otic vesicle region for  
182 neutrophil enumeration was performed using a zoomscope (EMS3/SyCoP3; Zeiss; Plan-  
183 NeoFluar Z objective). Image analysis was performed using Zen 2012 (blue edition, Carl Zeiss).

#### 184 *Photoconversion*

185 Adult *c3a.1<sup>+/-</sup>* zebrafish carrying an *mpx:Dendra2* transgene (54) were in-crossed and embryos  
186 collected and incubated to 3 dpf. Larvae were prescreened for fluorescence using a  
187 zoomscope (EMS3/SyCoP3; Zeiss; Plan-NeoFluar Z objective) and mounted in ZWEDGI  
188 devices as previously described (55). An imaging sequence was performed for each larva  
189 comprising an initial series of 2 overlapping Z-stacks of the region of the caudal hematopoietic  
190 tissue (CHT) and photoconversion of the neutrophils within the CHT. This was followed by a  
191 second series of 2 overlapping Z-stacks to confirm that photoconversion occurred.  
192 Photoconversion was performed using a laser scanning confocal microscope (FluoView  
193 FV1000; Olympus) with numerical aperture (NA) 0.75/20X objective. The following stimulation  
194 settings were used: 40% 405 nm laser transmissivity, 10  $\mu$ s/pixel dwell time, and 45 second  
195 total stimulation time. Larvae were removed from the ZWEDGI devices following  
196 photoconversion and subjected to wounding by tail transection as above. Larvae were  
197 subsequently imaged live at 3 hpw using a spinning disk confocal microscope as described  
198 below and then genotyped as above. Image analysis was performed using Zen 2012 (blue  
199 edition, Carl Zeiss), blinded to genotype.

#### 200 *Live imaging and image quantification*

201 3 dpf *c3a.1<sup>+/+</sup>* or *-/-* larvae carrying a *mpx:mcherry* transgene (56) were pre-screened for  
202 fluorescence on a zoomscope (EMS3/SyCoP3; Zeiss; Plan-NeoFluar Z objective). For imaging  
203 over 1-3 hours, larvae were mounted in ZWEDGI devices as previously described (55) and  
204 retained in place using 2% low melting point agarose applied to the head. Images were  
205 acquired every 3 minutes using a spinning disk confocal microscope (CSU-X, Yokogawa, NA  
206 0.3/10X EC Plan-NeoFluar objective) with a confocal scanhead on a Zeiss Observer Z.1  
207 inverted microscope equipped with a Photometrics Evolve EMCCD camera. Each image  
208 comprised a 50  $\mu\text{m}$  z-stack, with 11 slices taken at 5  $\mu\text{m}$  intervals. Images were analyzed and  
209 maximum intensity projections were made using Zen 2012 (blue edition) software (Carl Zeiss).  
210 To track cell motility, time series were analyzed in Imaris (Bitplane) and neutrophil mean track  
211 speed, track displacement, and track straightness, as well as instantaneous velocity for each  
212 neutrophil at each point in the time series, were calculated using the “spots” tool as previously  
213 described (57). To count total neutrophils and quantify neutrophil distribution in  
214 photoconversion experiments, 12 overlapping images were acquired to capture the full length  
215 and width of each larva and image analysis and neutrophil counts were performed using the  
216 “events” tool in Zen 2012 (blue edition, Carl Zeiss).

#### 217 *Human primary neutrophil purification*

218 Peripheral blood neutrophils from human blood were purified using the Miltenyi Biotec  
219 MACSxpress Neutrophil Isolation Kit according to the manufacturer’s instructions (Miltenyi  
220 Biotec, #130-104-434) and residual red blood cells were lysed using MACSxpress Erythrocyte  
221 Depletion Kit (Miltenyi Biotec, #130-098-196) All donors were healthy and informed consent was  
222 obtained at the time of the blood draw according to the requirements of the institutional review board  
223 (IRB).

#### 224 *Chemotaxis Assay*

225 Chemotaxis was assessed using a microfluidic device as described previously (58). In brief,  
226 polydimethylsiloxane devices were plasma treated and adhered to glass coverslips. Devices  
227 were coated with 10 µg/mL fibrinogen (Sigma) in PBS for 30 min at 37°C, 5% CO<sub>2</sub>. The devices  
228 were blocked with 2% BSA-PBS for 30 min at 37°C, 5% CO<sub>2</sub>, to block non-specific binding, and  
229 then washed twice with mHBSS. Cells were stained with calcein AM (Molecular Probes) in PBS  
230 for 10 min at room temperature followed by resuspension in modified Hank's balanced salt  
231 solution (mHBSS). Cells were seeded at 5 × 10<sup>6</sup>/mL to allow adherence for 30 min before  
232 addition of chemoattractant. Either 3µM Complement Component C3a (R&D Systems #3677-  
233 C3-025) or 3µM Complement Component C5a (R&D Systems #2037-C5-025/CF) or 1 µM IL-8  
234 (R&D Systems # 208-IL-10/CF) was loaded onto the devices. For pretreated samples, cells  
235 were incubated in 3µM C3a or blank mHBSS for 30min before seeding device. Cells were  
236 imaged for 45 min every 30 s on a Nikon Eclipse TE300 inverted fluorescent microscope with a  
237 10x objective and an automated stage using MetaMorph software (Molecular Devices).  
238 Automated cell tracking analysis was done using JEX software (59) to calculate chemotactic  
239 index and velocity.

#### 240 *Statistical analyses*

241 For neutrophil quantification and migration analyses, 3-4 independent replicate experiments  
242 were performed. Replicate numbers are noted in the figure legends. Experimental conditions  
243 were compared using analysis of variance. The results were summarized and plotted in terms  
244 of least squares adjusted means and standard errors.

245 For survival curves, 3 independent experiments were performed. Results were pooled and  
246 analyzed by Cox proportional hazard regression analysis, with experimental conditions included  
247 as group variables. Statistical analyses were performed using R version 3.4.4 and graphical  
248 representations were made using GraphPad Prism version 7. Significance was defined as  $P <$   
249 0.05. The resulting  $P$  values are included in the figure legends for each experiment.

250 For quantification of neutrophil instantaneous speed over time, a linear mixed effect regression  
251 model was used. Genotype and time were treated as fixed effects, with experimental replicate,  
252 fish, and neutrophil (within fish) treated as random effects. Statistical analyses were performed  
253 in R version 3.5.1, using the associated lme4 package. Reported *P* values are 2-sided and  
254 level of statistical significance preset to 0.05, with no adjustment for multiplicity.

## 255 **Results**

256 **TRAP-RNAseq identifies genes differentially regulated in neutrophils, macrophages, and**  
257 **epithelial cells in response to wounding.** Communication between multiple cell types,  
258 including leukocytes and epithelial cells, is essential to allow cells of the innate immune system  
259 to effectively navigate complex interstitial tissues to reach the wound microenvironment (60).  
260 However, the relative transcriptional contributions of each cell type are incompletely understood.  
261 To identify cell-specific signals that are differentially expressed in different cell types in response  
262 to wounding, we performed a large-scale translating protein affinity purification and RNA  
263 sequencing (TRAP-RNAseq) screen (**Fig. 1A**). Briefly, 3 dpf transgenic zebrafish larvae  
264 expressing an EGFP-tagged copy of the ribosomal subunit L10a specifically in neutrophils,  
265 macrophages, or epithelium were subjected to multiple fin tissue wounds. 3 hours later, larval  
266 tissue was homogenized and ribosomes were isolated with  $\alpha$ -GFP immunoprecipitation. RNA  
267 was then extracted. Illumina sequencing confirmed expression of *a priori*-selected, known cell-  
268 type-specific genes across all analyzed samples, validating our method (**Fig. 1B**). We then  
269 focused our analysis solely on zebrafish genes that have identified human homologs. From  
270 these genes, 299 were identified to be at least 2-fold changed (upregulated or downregulated)  
271 in neutrophils, 301 in macrophages, and 717 in epithelial cells. In neutrophils, we were  
272 surprised to find that only a single gene was statistically significantly upregulated in response to  
273 wounding: *c3a.1* (**Fig. 1D**). Although other changes in gene expression did not reach statistical  
274 significance, which is likely due to high variability among samples and small numbers of



275 replicates performed, we expect that 2-fold differential expression is potentially biologically  
276 relevant. It is interesting to note that relatively few genes were more than 2-fold differentially  
277 expressed in more than one cell type (**Fig. 1C and Supplemental Table 3**).

278 **TRAP-RNAseq identifies the complement pathway and *c3a.1* as factors upregulated upon**

279 **wounding.** *C3a.1* shares an approximately 43% amino acid similarity to the human C3a  
280 component of complement (48). Gene set enrichment analysis (GSEA) of Hallmark genes from  
281 the Molecular Signatures Database to identify groups of genes sharing a common biologic  
282 function (43) further showed enrichment of genes involved in the complement pathway in  
283 wounded fish, compared with unwounded controls (**Fig. 2A**). Although only *c3a.1* showed a  
284 statistically significant increase in mRNA expression in neutrophils following wounding, other  
285 complement pathway components, including *c5* and *c9*, also showed trends toward increased  
286 expression in neutrophils (**Fig. 2B**). Non-significant increases in *c3a.1*, *c5* and *c9* expression  
287 were also evident in macrophages. Further, complement factor B (*cfb*) was one of only 3  
288 genes that were differentially expressed in all 3 cell types (**Fig. 1C**). Taken together, these data  
289 suggest an important role for the complement pathway in general, and *c3a.1* in particular, in  
290 orchestrating innate immune responses in the context of wounding.

291 **Validation of *c3a.1*-deficient zebrafish lines.** In order to investigate the role of *c3a.1* in  
292 leukocyte responses in the context of wounding, we obtained zebrafish expressing an A to T  
293 nonsense mutation in exon 22 of 41 of the *c3a.1* sequence, producing a premature stop codon  
294 (sa31241, Sanger) (61) (**Fig. 3A**). This premature stop codon occurs prior to the predicted  
295 thioester bond and  $\alpha 2$  macroglobulin-complement domains of the C3A protein that characterize  
296 an anaphylatoxin (62). qPCR of cDNA from pooled 3 dpf *c3a.1*<sup>-/-</sup> larvae confirmed loss of *c3a.1*  
297 mRNA, compared with *c3a.1*<sup>+/+</sup> controls, and showed no significant compensatory upregulation  
298 of the other *c3a* orthologues expressed at this stage of larval development (**Fig. 3B**).

299 Amplification of *c3a.2-3*, *c3a.4*, and *c3a.5* by RT-qPCR was not observed; this is in agreement

300 with existing reports that these orthologues are not expressed in 3 dpf larvae (48). Expression  
301 of other major complement pathway genes based on qPCR of cDNA from pooled 3 dpf *c3a.1<sup>-/-</sup>*  
302 larvae was similar to that of *c3a.1<sup>+/+</sup>* controls: although a modest, non-significant decrease in  
303 *c3b.1* mRNA was noted, *c3b.2* mRNA was unchanged and a significant, potentially  
304 compensatory, increase in *c5a* mRNA was observed (**Fig. 3B**). *c3a.1<sup>-/-</sup>* larvae hatched in normal  
305 Mendelian ratios from *c3a.1<sup>+/-</sup>* in-crosses; however, the tail length of *c3a.1<sup>-/-</sup>* larvae was  
306 significantly shorter than *c3a.1<sup>+/+</sup>* clutch-mates at 4 dpf (**Fig. S1**). Heterozygotes were  
307 indistinguishable from their wild-type clutch-mates (data not shown).

308 **Global depletion of *c3a.1* decreases neutrophil recruitment to wounds.** Because *c3a.1*  
309 expression is significantly increased in neutrophils in response to wounding, we first  
310 investigated the neutrophil response to wounding in *c3a.1<sup>-/-</sup>* larvae. Compared with *c3a.1<sup>+/+</sup>*  
311 controls, *c3a.1<sup>-/-</sup>* larvae had significantly decreased numbers of neutrophils in the wound  
312 microenvironment at 2 hpw (**Fig. 3C-D**). However, by 8 hpw, neutrophil numbers at the wound  
313 did not differ between *c3a.1<sup>-/-</sup>* and *c3a.1<sup>+/+</sup>* larvae (**Fig. 3C-D**), suggesting that the neutrophil  
314 recruitment phenotype induced by *c3a.1* depletion is confined to the early post-wounding period.  
315 Changes in neutrophil numbers at the wound are due to a specific change in the recruitment  
316 response, as whole-larvae total neutrophil numbers did not differ between *c3a.1<sup>-/-</sup>* larvae and  
317 *c3a.1<sup>+/+</sup>* fish (**Fig. 3E**). These findings are in line with a neutrophil recruitment phenotype  
318 reported by Forn-Cuni, et al., in response to *c3a.1* knockdown using antisense morpholino (48).  
319 Macrophage recruitment to tail transection wounds did not differ between *c3a.1<sup>-/-</sup>* and *c3a.1<sup>+/+</sup>*  
320 larvae (**Fig. S2**). In addition, *c3a.1<sup>-/-</sup>* larvae displayed significantly decreased regenerate fin  
321 length at 24, 48, and 72 hours post-wounding, compared with *c3a.1<sup>+/+</sup>* clutchmates (**Fig. S3**).  
322 Taken together, these findings suggest that C3A modulates neutrophil wound responses and  
323 wound healing in zebrafish larvae.

324 **Global depletion of *c3a.1* decreases neutrophil recruitment to, and survival of, localized**  
325 **bacterial infection.** The complement system plays an essential role in pathogen recognition  
326 and clearance, and patients with deficiencies in the classical complement pathway are  
327 susceptible to pyogenic infections (63). Thus, we next measured the ability of neutrophils in  
328 *c3a.1*-deficient larvae to migrate to localized bacterial infections. Using an established model of  
329 localized *Pseudomonas aeruginosa* infection of the otic vesicle (64), we found that *c3a.1*<sup>-/-</sup>  
330 larvae had fewer neutrophils at the site of the infection at both 1 hour post-infection (hpi) and 6  
331 hpi, compared with *c3a.1*<sup>+/+</sup> controls (**Fig. 4 A-B**). Neutrophils are believed to be the main cell  
332 type responsible for resistance to *Pseudomonas* infections (65). Consistent with the defect in  
333 neutrophil recruitment we observed, we found that *c3a.1*<sup>-/-</sup> larvae had increased susceptibility to  
334 *Pseudomonas* infection, with ~50% of infected larvae dying by only 1 dpi. In contrast, >95% of  
335 *c3a.1*<sup>+/+</sup> larvae survived to 5 dpi (hazard ratio: *c3a.1*<sup>-/-</sup> vs. *c3a.1*<sup>+/+</sup> = 11.091) (**Fig. 4C**).

336 ***C3a.1* mediates resistance to *Pseudomonas aeruginosa* infection in a neutrophil-**  
337 **dependent manner.** Increased susceptibility to localized *Pseudomonas* infection in *c3a.1*<sup>-/-</sup>  
338 larvae could be due to impaired neutrophil recruitment or function, and/or the loss of other  
339 complement-mediated effects since C3A is known to have potent antimicrobial activity(66). To  
340 determine whether increased susceptibility to *Pseudomonas* infection in *c3a.1*<sup>-/-</sup> larvae is due to  
341 neutrophil-intrinsic activity, we crossed the *c3a.1*-deficient line to the *Tg(mpx:mcherry-2A-*  
342 *rac2*<sup>D57N</sup>) line, in which mcherry-labeled neutrophils express a dominant negative form of Rac2  
343 and are thus rendered migration-deficient. As we have previously reported (51), *c3a.1*<sup>+/+</sup> larvae  
344 with neutrophils expressing *rac2*<sup>D57N</sup> have increased susceptibility to *Pseudomonas* infection,  
345 with ~50% mortality at 1 dpi. In comparison, we noted no significant change in susceptibility in  
346 *c3a.1*<sup>-/-</sup> larvae with neutrophils expressing *rac2*<sup>D57N</sup>, compared with *c3a.1*-intact *rac2*<sup>D57N</sup> larvae  
347 (HR *c3a.1*<sup>-/-</sup> *rac2*<sup>D57N</sup> vs. *c3a.1*<sup>+/+</sup> *rac2*<sup>D57N</sup> = 1.236) (**Fig. 4D**). Therefore, the increase in  
348 susceptibility to *Pseudomonas* infection we observed in *c3a.1*<sup>-/-</sup> larvae expressing wild-type *rac2*

349 is predominantly due to a neutrophil-intrinsic function of c3a, possibly due to the reduction in  
350 numbers of neutrophils found at the infection site.

351 **Depletion of c3a.1 does not alter neutrophil egress from hematopoietic tissues following**  
352 **wounding.** We next asked how C3A controls neutrophil mobilization from hematopoietic tissue.  
353 In response to inflammatory signals, zebrafish neutrophils may be released directly from  
354 hematopoietic tissues or recruited from a population of neutrophils already patrolling in  
355 peripheral tissues (67). C3a has been shown in mice to help to retain immature neutrophils in  
356 hematopoietic tissues (68, 69). C3 and C3A receptor-deficient mice subsequently have faster  
357 and more pronounced neutrophil egress from bone marrow in response to inflammatory stimuli  
358 (70). Although this finding is opposite to the decreased neutrophil numbers that we observe at a  
359 wound in larval zebrafish (**Fig. 1C-D**), we still wanted to determine whether decreased  
360 neutrophil numbers at inflammatory sites in *c3a.1*<sup>-/-</sup> larvae were due to a difference in neutrophil  
361 recruitment from hematopoietic tissue. At 3 dpf, the primary organ of hematopoiesis in the  
362 larval zebrafish is the caudal hematopoietic tissue (CHT), in which hematopoiesis resembles  
363 that within the mammalian fetal liver (71). We crossed the *c3a.1*-deficient line to the  
364 *Tg(mpx:dendra2)* line, in which neutrophils are labeled with the photoconvertible fluorophore  
365 Dendra2, enabling fate tracking of neutrophils originating from the CHT over time (54). We  
366 photoconverted neutrophils in the CHT and then subjected the larvae to tail transection. We  
367 subsequently counted both the photoconverted neutrophils remaining in the CHT and those  
368 mobilized to the periphery at 3 hpw (**Fig. S4A**). Neither the number of neutrophils retained in  
369 the CHT nor the number mobilized neutrophils differed between *c3a.1*<sup>+/+</sup> and *c3a.1*<sup>-/-</sup> larvae (**Fig.**  
370 **S4B-C**). This suggests that decreased neutrophil numbers at the wound in *c3a.1*<sup>-/-</sup> larvae are  
371 not due to alterations in neutrophil egress from the hematopoietic tissue and led us to more  
372 closely examine neutrophil interstitial migration.

373 **C3A is not a direct chemoattractant for human primary neutrophils *in vitro*, but may**  
374 **sensitize neutrophils to respond to other chemoattractants.** C5A has been well-  
375 characterized as a potent neutrophil chemoattractant (72). C3A and C5A are highly structurally  
376 similar and share a 36% amino acid identity (73); however, the effects of C3A on neutrophil  
377 polarization and migration are less well understood. Numerous authors have reported that C3A  
378 does not serve as a neutrophil chemoattractant *in vitro* (72, 74, 75). Using *in vitro* microfluidic  
379 systems, we first confirmed that primary human neutrophils show strong directional migration  
380 toward an established gradient of C5A, but do not migrate toward an established gradient of  
381 C3A (**Fig. 5A-B and Movie 1**).

382 C3A has, however, been implicated in enhancing the homing responses of both hematopoietic  
383 progenitor cells and B cells to CXCL-12 (SDF-1) (69). Further, neutrophils display polarization  
384 responses to C3A in co-preparations with eosinophils but not when alone, suggesting that C3A  
385 stimulates neutrophils indirectly (75). We therefore questioned whether C3A enhances  
386 neutrophil migration by sensitizing neutrophils to migrate toward IL-8, a major bioactive  
387 neutrophil chemoattractant (76), both in zebrafish wounds(50, 77) and in human wounds and  
388 skin graft sites (78, 79). Using microfluidic devices, we found that the total number of  
389 neutrophils arriving at the source of an established gradient of IL-8 did not differ between C3A-  
390 pre-treated neutrophils and untreated controls, although there was considerable variation  
391 between both technical and biological replicates (**Fig. 5C**). We therefore focused specifically on  
392 the neutrophils in each device that eventually reached the chemoattractant source and  
393 measured the time at which each neutrophil arrived at the source. Analysis of either the first  
394 20% or first 50% of neutrophils to arrive at the source revealed that neutrophils pre-treated with  
395 C3A arrived faster than control neutrophils (**Fig 5D**). These findings suggest that C3a may  
396 prime neutrophils to respond more quickly to other exogenous cues.

397 **Loss of *c3a.1* impairs neutrophil recruitment *in vivo* by decreasing neutrophil migration**  
398 **speed early after wounding.** Our data thus far suggest a role for C3A in priming neutrophils to  
399 migrate effectively toward other chemotactic signals. Thus, we next tested whether the  
400 impaired neutrophil recruitment phenotype we observed in *c3a.1*<sup>-/-</sup> zebrafish larvae was due to  
401 alterations in the dynamics of interstitial migration to the wound. We took advantage of the  
402 amenability of larval zebrafish to live time-lapse imaging and single-cell tracking to determine  
403 how the interstitial migration characteristics of neutrophils in *c3a.1*-deficient larvae differ from  
404 those of wild-type controls. To do this, we crossed the *c3a.1*-deficient line to the  
405 *Tg(mpx:mcherry)* line (56), in which neutrophils express the fluorescent protein mcherry.  
406 Following tail transection, we imaged labeled neutrophils in the wound microenvironment for 1  
407 hour and tracked the neutrophils using Imaris software (Bitplane) (**Fig. 6A, still images, and**  
408 **movie 2**). We found that average neutrophil speed during the first 30 minutes after wounding is  
409 significantly impaired in *c3a.1*<sup>-/-</sup> larvae, compared to *c3a.1*<sup>+/+</sup> controls. This change in neutrophil  
410 migratory behavior is confined to the early post-wounding period, as when speed is averaged  
411 over the first 60 minutes post-wound, it is not different between groups (**Fig. 6B**). The mean  
412 displacement and track straightness traveled by the neutrophils also did not differ between  
413 groups (**Fig. S5A-B**). Decreased neutrophil speed in *c3a.1*<sup>-/-</sup> larvae is specific to neutrophil  
414 directed migration, as neutrophil random migration in the absence of an inflammatory stimulus is  
415 not impaired in *c3a.1*<sup>-/-</sup> larvae, and neutrophil random migration speed is in fact slightly faster in  
416 *c3a.1*-deficient zebrafish than in *c3a.1*<sup>+/+</sup> controls (**Fig. S5C**). Finally, quantification of each  
417 neutrophil's instantaneous speed at 3 minute intervals over the first hour post-wounding shows  
418 that neutrophils in *c3a.1*-intact larvae rapidly achieve and maintain a steady speed toward the  
419 wound. In contrast, neutrophils in *c3a.1*<sup>-/-</sup> initially migrate significantly more slowly, before  
420 accelerating to reach *c3a.1*<sup>+/+</sup> speeds by about 30 minutes post-wound (**Fig. 6C-D**). Altogether,  
421 these data support the idea that C3A primes neutrophil responses to damaged tissues.

## 422 Discussion

423 Here we report, for the first time, the results of a cell-specific translation profiling screen  
424 designed to identify genes differentially expressed in the inflammatory context of wounding in  
425 the larval zebrafish model. We have previously shown that the signals that guide neutrophils to  
426 sites of sterile injury differ from those that regulate migration to bacterial infection; specifically,  
427 that, while PI3K signaling is required in both contexts, tissue-generated H<sub>2</sub>O<sub>2</sub> signaling is  
428 required for neutrophil responses to wounds, but is dispensable for neutrophil responses to  
429 infection (80). Our work here supports the increasing recognition that molecular drivers of  
430 innate immune system inflammation are not universal. Context-dependent alterations in the  
431 transcriptomes of leukocytes and epithelial cells have the potential to uncover more genes that  
432 are differentially expressed only in response to a specific type of inflammatory stimulus. We  
433 have also demonstrated the utility of large-scale translation profiling screens in zebrafish to  
434 identify promising genes for further study.

435 We were surprised to find relatively little overlap in the transcriptomes of neutrophils,  
436 macrophages, and epithelial cells in that few genes identified by our screen were differentially  
437 expressed in more than one cell type. This suggests the presence of a complex network of  
438 inter- and intracellular signals, in which cross-communication among cell types is essential for  
439 optimal leukocyte recruitment and subsequent wound healing.

440 We identified *c3a.1* as the only gene significantly upregulated in neutrophils in response to  
441 wounding. This finding is interesting because, while the complement system has been  
442 implicated in multiple inflammatory contexts, including wounding, infection, and hematopoiesis,  
443 it is best understood in infection, where it functions to opsonize bacteria for phagocytosis or kill  
444 them directly via assembly of the membrane attack complex (19, 63). Similar to our finding that  
445 *c3a.1*<sup>-/-</sup> zebrafish have impaired survival to bacterial infection, mice deficient in either C3 or the  
446 C3A receptor have increased susceptibility to septic arthritis (81), and mice with C3A over-



447 activation induced by deletion of the scavenger carboxypeptidase B2 displayed a survival  
448 benefit in the context of polymicrobial sepsis (82), confirming a specific, protective role for C3A  
449 in infectious inflammatory contexts. However, we find that, in larval zebrafish, C3A acts through  
450 neutrophils, as C3A mutation had no further effect when neutrophils were defective.

451 The role of C3A in the context of sterile injury is less well understood. C3A signaling through  
452 the C3A receptor (C3AR) is required for hepatocyte proliferation and liver regeneration following  
453 toxic liver injury in mice (83), and C3A can be detected in the wound microenvironment of  
454 incised skin wounds in guinea pigs (84). Rafail et al. showed in 2015 that C3<sup>-/-</sup> mice have faster  
455 early wound healing and decreased neutrophil recruitment at wounds than their wild-type  
456 counterparts (85). However, while this work showed evidence of a role for the complement  
457 pathway in wound-associated inflammation and wound healing, the findings were attributed to a  
458 lack of downstream C5a-C5aR1 signaling rather than specific loss of C3A activation (85). Our  
459 findings suggest a specific role for C3A in recruiting neutrophils to wounds. We further show  
460 that C3A exerts its effects by enhancing neutrophil responses to other chemoattractants,  
461 including IL-8.

462 Because zebrafish C3A and C3B are believed to be the products of different genes and in our  
463 *c3a.1<sup>-/-</sup>* model C5A expression is not decreased, our data suggest a specific requirement for  
464 C3A in efficient neutrophil recruitment to wounds. However, the length of the zebrafish C3A.1  
465 amino acid sequence is longer than that of human C3A (1643 amino acids in the zebrafish (38),  
466 versus 77 amino acids in humans (86)) and contains a consensus sequence for a thioester  
467 bond similar to the one cleaved in human C3 to produce C3A and C3B. This suggests that  
468 additional, post-translational cleavage occurs in zebrafish to activate C3A.1; alternatively,  
469 cleavage of C3A.1 may contribute at least some C3B and downstream complement component  
470 activity in zebrafish. It is a limitation of our study that, similar to other authors (48) and most  
471 likely due to the large size of the gene, we were not able to express C3A and rescue the



472 neutrophil recruitment phenotype in our *c3a.1*<sup>-/-</sup> model. However, our findings are consistent  
473 with the neutrophil recruitment phenotype reported by Forn-Cuni, et al., using *c3a.1* depletion by  
474 morpholino (48). Further, in our *in vitro* data generated using human primary neutrophils, we  
475 demonstrate that the addition of exogenous C3A induces increased neutrophil chemotaxis to IL-  
476 8, a phenotype that is consistent with what we observed *in vivo* with *c3a.1* depletion. Taken  
477 together, these findings suggest that C3A plays a role in priming neutrophils for efficient  
478 responses to tissue damage cues.

479 Finally, our data raise additional questions about a neutrophil-specific role for C3A. Our data  
480 using *rac2*<sup>D57N</sup> zebrafish mutants suggest that, during infection, impaired survival in *c3a.1*<sup>-/-</sup>  
481 larvae is a neutrophil-dependent phenotype. Experiments using either global depletion of *c3a.1*  
482 or addition of exogenous C3A show a role for C3A in sensitizing neutrophils to respond to other  
483 chemoattractants, such as IL-8; however, *c3a.1* is produced by many cell types (48), and in  
484 mammals, C3 is found pre-formed in serum and C3A activated upon injury or infection (19, 73).  
485 While our experiments show general effects of C3A on neutrophils, the role of *c3a.1* produced  
486 specifically by neutrophils, as indicated by our TRAP-RNAseq results, remains an open  
487 question. Autocrine C3AR1 signaling has been implicated in B cell activation and class-switch  
488 recombination (87). Neutrophils, as well as other myeloid cells and non-myeloid cells, express  
489 C3AR (73, 88), which may be contained in secretory granules and mobilized to the cell surface  
490 upon activation (89). Further, neutrophils are able to trigger alternative pathway activation of  
491 plasma complement, leading to enhanced neutrophil CD11b expression and respiratory burst  
492 (90). However, a specific role for C3AR signaling, autocrine or otherwise, in neutrophil directed  
493 migration has not yet been addressed.

494 In summary, our data identify the complement pathway as a whole, and *c3a.1* in particular, as  
495 significantly upregulated in neutrophils in response to wounding. Our data further support a  
496 zebrafish model with conserved C3A activity. We demonstrate a role for C3A in priming

497 neutrophils for efficient migration to other chemoattractants, both in vivo in zebrafish and in vitro  
498 in human primary neutrophils; however, the role of autocrine neutrophil C3A-C3AR signaling  
499 warrants further investigation. On the basis of these observations, we conclude that C3A plays  
500 an underappreciated role in mediating neutrophil migration. By exploiting the genetic resources  
501 of the larval zebrafish model, we and others are well positioned to further investigate the role of  
502 neutrophil-derived C3A in optimizing neutrophil recruitment to wounding. Finally, these results  
503 support the power of TRAP in the identification of cell type specific changes in gene expression  
504 that may influence inflammation and wound healing.

## 505 **Figure Legends**

506 **FIGURE 1. TRAP-RNAseq identifies differential expression of genes by neutrophils,**  
507 **macrophages, and epithelial cells in response to wounding.** (A) Experimental setup. 3 dpf  
508 transgenic zebrafish larvae expressing an EGFP-tagged copy of the ribosomal subunit L10a  
509 specifically in neutrophils (*lyz*), macrophages (*mpeg1*), or epithelium (*krt4*) were subjected to  
510 multiple fin tissue wounds. 3 hours later, larval tissue was homogenized and ribosomes were  
511 isolated with  $\alpha$ -EGFP immunoprecipitation. RNA was then extracted and subject to Illumina  
512 sequencing. (B) Expression of a priori tissue-specific genes across all analyzed samples.  
513 Columns represent samples, labeled by cell type-specific promoter used, rows represent known  
514 cell-type-specific genes. (C) Venn diagram of genes found to be more than 2-fold changed by  
515 wounding in each cell type. (D) Genes with expression significantly altered ( $p_{\text{adj}} < 0.05$ ) upon  
516 wounding.

517

518 **FIGURE 2. TRAP-RNAseq identifies upregulation of the complement pathway and c3a.1**  
519 **in response to wounding.** (A) Normalized enrichment scores of Molecular Signatures  
520 Database Hallmark Gene Sets (rows) in each cell type (columns), from Gene Set Enrichment

521 Analysis (GSEA). (B) Expression (fpkm) of three complement-pathway genes (*c3a.1*, *c5*, and  
522 *c9*) across all three cell types. Each dot represents one replicate.

523

524 **FIGURE 3. Global depletion of *c3a.1* decreases early neutrophil recruitment to a wound.**

525 (A) Schematic of *c3a.1* locus (top), with exons represented as black boxes. \* indicates  
526 approximate location of A>T nonsense mutation in exon 22 in sa31241 mutant. Schematic of  
527 WT (middle) and mutated (bottom) C3a.1 protein, with selected *Pfam*-predicted domains noted.  
528 Green:  $\alpha 2$  macroglobulin; red: thiolester bond-forming region; yellow:  $\alpha 2$  macroglobulin  
529 complement component. (B) RT-qPCR validation of *c3a*, *c3b*, and *c5a* orthologue expression  
530 in pooled WT and *c3a.1*<sup>-/-</sup> (sa31241) whole zebrafish larvae, normalized to WT expression for  
531 each gene and to *ef1a*, with data expressed as mean +/- SEM. Data comprise 3 independent  
532 experiments, performed in triplicate, n = 50 larvae per condition per experiment. B, C. 3 dpf WT  
533 or *c3a.1*<sup>-/-</sup> zebrafish larvae were subjected to wounding by tail transection (dashed line),  
534 subsequently stained with Sudan Black B, and the tail region (box) was imaged. (B)  
535 Representative images and (C) quantification of neutrophil recruitment following tail transection  
536 in WT (n = 31, 2 hpw; 32, 8 hpw) and *c3a.1*<sup>-/-</sup> (n = 41, 2 hpw; 33, 8 hpw) larvae, with data  
537 expressed as mean +/- SEM. (D) Quantification of total neutrophil counts in WT (n = 21) and  
538 *c3a.1*<sup>-/-</sup> (n = 35) larvae, with data expressed as mean +/- SEM. For C and D, each dot  
539 represents one larva; colors represent results of 3 independent experiments. \*p<0.05, \*\*p<0.01,  
540 \*\*\*p<0.001

541

542 **FIGURE 4. Global depletion of *c3a.1* decreases neutrophil recruitment to, and**  
543 **subsequent survival of, localized bacterial infection.** A, B. WT (n = 71, 1 hpw; 65, 6 hpw)  
544 and *c3a.1*<sup>-/-</sup> (n = 71, 1 hpw; 68, 6 hpw) larvae were inoculated with 1000 CFU *Pseudomonas*

545 *aeruginosa* in the left otic vesicle and subsequently stained with Sudan Black B. (A)  
546 Representative images and (B) quantification of neutrophil recruitment following otic vesicle  
547 infection, with data expressed as mean +/- SEM. Each dot represents one larva; colors  
548 represent results of 3 independent experiments. \*\*\* $p < 0.001$  (C) WT (n = 24) and *c3a.1*<sup>-/-</sup> (n =  
549 32) larvae were infected with 7500 CFU *Pseudomonas aeruginosa* in the left otic vesicle and  
550 survival was tracked over 5 days post-infection. (D) To test whether survival was neutrophil-  
551 dependent, *c3a.1*<sup>+/+</sup> (n = 16) and *c3a.1*<sup>-/-</sup> (n = 14) larvae with neutrophils that are mcherry-  
552 labeled and carry a mutation in *rac2* rendering them migration-defective (*Tg(mpx:rac2*<sup>D57N</sup>-  
553 *mcherry*)) were infected with *Pseudomonas aeruginosa* as in C and survival was tracked over 5  
554 days post-infection. C and D each comprise 3 independent experiments.

555

556 **FIGURE 5. C3A sensitizes human primary neutrophils to IL-8 in vitro.** (A) Representative  
557 tracks of  $5 \times 10^6$  human neutrophils exposed to a gradient of either C3A or C5A in a microfluidic  
558 device. Yellow tracks represent net migration toward source, and red tracks represent net  
559 migration away from the source. Black arrow indicates direction of gradient from low  
560 concentration to high concentration. (B) Quantification of chemotactic index of human  
561 neutrophils exposed to a gradient of either C3A (3  $\mu$ M source) or C5A (3  $\mu$ M source), expressed  
562 as mean +/- SEM. \*\* $p < 0.01$ . (C-D) Human primary neutrophils were pre-treated with 3  $\mu$ M C3A  
563 for 30 min and their migration characteristics toward a gradient of IL-8 (1  $\mu$ M source), compared  
564 with non-pretreated neutrophils. (C) Quantification of total number of neutrophils reaching the  
565 chemotactic source in 45 minutes, expressed as mean +/- SEM. (D) Quantification of time  
566 required for 20% (left) or 50% (right) of all neutrophils that will reach the chemotactic source  
567 over 45 minutes to arrive, expressed as mean +/- SEM. For C and D, each dot represents the  
568 result of one technical replicate; colors indicate the results of 3 biologic replicates. \* $p < 0.05$ ,  
569 \*\* $p < 0.01$ .

570

571 **FIGURE 6. Loss of *c3a.1* impairs neutrophil recruitment by decreasing neutrophil**  
572 **migration speed early after wounding.** (A) Time-lapse photomicrographs of neutrophil  
573 recruitment to tail-transected caudal fins of *c3a.1*<sup>+/+</sup> (n = 8) or *c3a.1*<sup>-/-</sup> larvae (n = 8) with mcherry-  
574 labeled neutrophils (*Tg(mpx:mcherry)*), 0-60 minutes post-wound, showing tracks of forward  
575 migrating neutrophils. (B) Quantification of mean track speed of forward-migrating neutrophils,  
576 expressed as mean +/- SEM. Each dot represents the mean of the first 5 neutrophils recruited  
577 to the wound of an individual larva. Colors represent the results of 4 independent experiments.  
578 \*p<0.05 (C) Graph, expressed as mean, and (D) quantification of instantaneous speed of all  
579 forward-migrating neutrophils over the first 60 minutes following wounding. In (D), for speed  
580 and fold change, data are expressed as median (center values), with 95% confidence intervals  
581 (small print). Data comprise 4 independent experiments. \*p<0.05.

582

### 583 **Supplemental Data:**

584 **Table 1:** Published zebrafish lines used in this study.

585

586 **Table 2:** Primer sequences used in this study.

587

588 **Table 3:** Differentially expressed genes shown in Figure 1 C-D.

589

590 **S1:** Global depletion of *c3a.1* delays tail development and decreases regenerate length  
591 following tail transection. Quantification of caudal fin length during larval development, 4dpf-

592 6dpf, of *c3a.1<sup>+/+</sup>* (n = 40, 4dpf; 40, 5dpf; 19, 6dpf) and *c3a.1<sup>-/-</sup>* (n = 36, 4dpf; 34, 5dpf; 13, 6dpf)  
593 larvae. All data are expressed as mean +/- SEM, with each dot representing 1 larva and colors  
594 representing the results of 3 independent experiments. \*\*p<0.01.

595

596 **S2.** Global depletion of *c3a.1* does not alter macrophage recruitment to tail wounds.

597 Quantification of macrophage numbers at the wound following tail transection of *c3a.1<sup>+/+</sup>* (n =  
598 15, 4hpw; 10, 24hpw) or *c3a.1<sup>-/-</sup>* (n = 19, 4hpw; 17, 24hpw) *Tg(mpeg1:GFP)* larvae, expressed  
599 as mean +/-SEM. Each dot represents one larva; colors represent the results of 3 independent  
600 experiments.

601

602 **S3.** Fin regeneration is impaired after tail transection in *c3a.1<sup>-/-</sup>* larvae. Quantification of caudal  
603 fin regenerate length following tail transection, 24 hpw-72 hpw, of *c3a.1<sup>+/+</sup>* (n = 20, 24 hpw; 20,  
604 48 hpw; 36, 72 hpw) and *c3a.1<sup>-/-</sup>* (n = 39, 24 hpw; 40, 48 hpw; 36, 72 hpw) larvae. All data are  
605 expressed as mean +/- SEM, with each dot representing 1 larva and colors representing the  
606 results of 3 independent experiments. \*\*p<0.01, \*\*\*\*p<0.0001.

607

608 **S4.** (A) CHT neutrophils of *Tg(mpx:dendra2) c3a.1<sup>+/+</sup>* or *c3a.1<sup>-/-</sup>* were photoconverted and the  
609 larvae subjected to tail transection. (B) Quantification of photoconverted neutrophils retained in  
610 the CHT at 3hpw. (C) Quantification of photoconverted neutrophils outside the CHT at 3hpw.  
611 *C3a.1<sup>+/+</sup>* (n=16); *c3a.1<sup>-/-</sup>* (n=22). All data are expressed as mean +/- SEM, with each dot  
612 representing one larva and colors representing 4 independent experiments.

613

614 **Movie 1.** (A) Representative time-lapse movies of human primary neutrophils exposed to a  
615 gradient of either C5a (3 uM source, left) or C3a (3 uM source, right). The source of the  
616 gradient is located center-bottom. (B) Representative time-lapse movies of human primary  
617 neutrophils exposed to a gradient of IL-8 (1 uM source) following pretreatment with either media  
618 (left) or 3 uM C3a (right). The source gradient is located center-bottom.

619 **Movie 2.** Representative time-lapse movies of recruitment of mcherry-labeled neutrophils to  
620 tail-transected caudal fins of *c3a.1<sup>+/+</sup>* (left) or *c3a.1<sup>-/-</sup>* (right) zebrafish larvae, 0-60 minutes post-  
621 wound. Tracks of forward-migrating neutrophils are labeled in color.

622

623 **S5.** (A) Quantification of mean linear displacement distance traveled by forward-migrating  
624 neutrophils in *c3a.1<sup>+/+</sup>* (n = 8) and *c3a.1<sup>-/-</sup>* (n = 8) during early neutrophil recruitment. (B) Mean  
625 track straightness of forward-migrating neutrophils during early neutrophil recruitment does not  
626 differ between *c3a.1<sup>+/+</sup>* (n = 8) and *c3a.1<sup>-/-</sup>* (n = 8) larvae. (C) Quantification of mean track speed  
627 of randomly migrating neutrophils in the heads of unwounded *c3a.1<sup>+/+</sup>* (n = 9) or *c3a.1<sup>-/-</sup>* (n = 8)  
628 larvae. All data are expressed as mean +/- SEM. Each dot represents the mean of value for all  
629 neutrophils for one larva. Colors represent results of 4 independent experiments. \*p<0.05.

630

## 631 **Acknowledgements**

632 We would like to thank Christina M. Freisinger and Elizabeth A. Harvie for assistance with the  
633 TRAP sample preparation. We would also like to acknowledge the UW-Madison Biotechnology  
634 Center for assistance with library preparation and Illumina sequencing. We thank Michael R.  
635 Lasarev from the UW-Madison Department of Biostatistics and Medical Informatics for  
636 additional support provided through the Clinical and Translation Science Award (CTSA)

637 program, grant UL1TR002373. This work was funded by NIH R35 GM1 18027 01 (AH). RAH  
638 was supported by an individual fellowship under NIH T32HL07899.

## 639 **References**

- 640 1. LeBert, D. C., and A. Huttenlocher. 2014. Inflammation and wound repair. *Seminars in*  
641 *immunology* 26: 315-320.
- 642 2. Nathan, C. 2006. Neutrophils and immunity: challenges and opportunities. *Nat Rev*  
643 *Immunol* 6: 173-182.
- 644 3. Lieschke, G. J., A. C. Oates, M. O. Crowhurst, A. C. Ward, and J. E. Layton. 2001.  
645 Morphologic and functional characterization of granulocytes and macrophages in  
646 embryonic and adult zebrafish. *Blood* 98: 3087-3096.
- 647 4. van Furth, R., P. H. Nibbering, J. T. van Dissel, and M. M. Diesselhoff-den Dulk. 1985.  
648 The characterization, origin, and kinetics of skin macrophages during inflammation. *J*  
649 *Invest Dermatol* 85: 398-402.
- 650 5. Leibovich, S. J., and R. Ross. 1975. The role of the macrophage in wound repair. A  
651 study with hydrocortisone and antimacrophage serum. *Am J Pathol* 78: 71-100.
- 652 6. Niethammer, P., C. Grabher, A. T. Look, and T. J. Mitchison. 2009. A tissue-scale  
653 gradient of hydrogen peroxide mediates rapid wound detection in zebrafish. *Nature* 459:  
654 996-999.
- 655 7. Yoo, S. K., T. W. Starnes, Q. Deng, and A. Huttenlocher. 2011. Lyn is a redox sensor  
656 that mediates leukocyte wound attraction in vivo. *Nature* 480: 109-112.
- 657 8. Yoo, S. K., C. M. Freisinger, D. C. LeBert, and A. Huttenlocher. 2012. Early redox, Src  
658 family kinase, and calcium signaling integrate wound responses and tissue regeneration  
659 in zebrafish. *J Cell Biol* 199: 225-234.



- 660 9. Mathias, J. R., B. J. Perrin, T. X. Liu, J. Kanki, A. T. Look, and A. Huttenlocher. 2006.  
661 Resolution of inflammation by retrograde chemotaxis of neutrophils in transgenic  
662 zebrafish. *J Leukoc Biol* 80: 1281-1288.
- 663 10. Renshaw, S. A., C. A. Loynes, D. M. I. Trushell, S. Elworthy, P. W. Ingham, and M. K. B.  
664 Whyte. 2006. A transgenic zebrafish model of neutrophilic inflammation. *Blood* 108:  
665 3976-3978.
- 666 11. Bennett, C. M., J. P. Kanki, J. Rhodes, T. X. Liu, B. H. Paw, M. W. Kieran, D. M.  
667 Langenau, A. Delahaye-Brown, L. I. Zon, M. D. Fleming, and A. T. Look. 2001.  
668 Myelopoiesis in the zebrafish, *Danio rerio*. *Blood* 98: 643-651.
- 669 12. Herbomel, P., B. Thisse, and C. Thisse. 1999. Ontogeny and behaviour of early  
670 macrophages in the zebrafish embryo. *Development* 126: 3735-3745.
- 671 13. Ellett, F., L. Pase, J. W. Hayman, A. Andrianopoulos, and G. J. Lieschke. 2011. *mpeg1*  
672 promoter transgenes direct macrophage-lineage expression in zebrafish. *Blood* 117:  
673 e49-56.
- 674 14. Holland, M. C., and J. D. Lambris. 2002. The complement system in teleosts. *Fish*  
675 *Shellfish Immunol* 12: 399-420.
- 676 15. Boshra, H., J. Li, and J. O. Sunyer. 2006. Recent advances on the complement system  
677 of teleost fish. *Fish Shellfish Immunol* 20: 239-262.
- 678 16. Lam, P.-Y., R. S. Fischer, W. D. Shin, C. M. Waterman, and A. Huttenlocher. 2014.  
679 Spinning disk confocal imaging of neutrophil migration in zebrafish. *Methods in*  
680 *molecular biology (Clifton, N.J.)* 1124: 219-233.
- 681 17. Lam, P.-y., E. A. Harvie, and A. Huttenlocher. 2013. Heat shock modulates neutrophil  
682 motility in zebrafish. *PLoS one* 8: e84436-e84436.
- 683 18. Chaplin, H., Jr. 2005. Review: the burgeoning history of the complement system 1888-  
684 2005. *Immunohematology* 21: 85-93.

- 685 19. Janeway, C. J., P. Travers, M. Walport, and e. al. 2001. The Complement System and  
686 Innate Immunity. In *Immunobiology: The Immune System in Health and Disease*, 5 ed.  
687 Garland Science, New York.
- 688 20. Hartung, H. P., and U. Hadding. 1983. Synthesis of complement by macrophages and  
689 modulation of their functions through complement activation. *Springer Semin*  
690 *Immunopathol* 6: 283-326.
- 691 21. Muller, W., H. Hanauske-Abel, and M. Loos. 1978. Biosynthesis of the first component of  
692 complement by human and guinea pig peritoneal macrophages: evidence for an  
693 independent production of the C1 subunits. *J Immunol* 121: 1578-1584.
- 694 22. Reis, E. S., J. A. Barbuto, and L. Isaac. 2006. Human monocyte-derived dendritic cells  
695 are a source of several complement proteins. *Inflamm Res* 55: 179-184.
- 696 23. Reis, E. S., J. A. Barbuto, and L. Isaac. 2007. Complement components, regulators and  
697 receptors are produced by human monocyte-derived dendritic cells. *Immunobiology* 212:  
698 151-157.
- 699 24. Hetland, G., E. Johnson, R. J. Falk, and T. Eskeland. 1986. Synthesis of complement  
700 components C5, C6, C7, C8 and C9 in vitro by human monocytes and assembly of the  
701 terminal complement complex. *Scand J Immunol* 24: 421-428.
- 702 25. Wirthmueller, U., B. Dewald, M. Thelen, M. K. Schafer, C. Stover, K. Whaley, J. North,  
703 P. Eggleton, K. B. Reid, and W. J. Schwaeble. 1997. Properdin, a positive regulator of  
704 complement activation, is released from secondary granules of stimulated peripheral  
705 blood neutrophils. *J Immunol* 158: 4444-4451.
- 706 26. Faried, H. F., T. Tachibana, and T. Okuda. 1993. The secretion of the third component  
707 of complement (C3) by human polymorphonuclear leucocytes from both normal and  
708 systemic lupus erythematosus cases. *Scand J Immunol* 37: 19-28.

- 709 27. Hogasen, A. K., R. Wurzner, T. G. Abrahamsen, and M. P. Dierich. 1995. Human  
710 polymorphonuclear leukocytes store large amounts of terminal complement components  
711 C7 and C6, which may be released on stimulation. *J Immunol* 154: 4734-4740.
- 712 28. Bensa, J. C., A. Reboul, and M. G. Colomb. 1983. Biosynthesis in vitro of complement  
713 subcomponents C1q, C1s and C1 inhibitor by resting and stimulated human monocytes.  
714 *Biochem J* 216: 385-392.
- 715 29. Whaley, K. 1980. Biosynthesis of the complement components and the regulatory  
716 proteins of the alternative complement pathway by human peripheral blood monocytes. *J*  
717 *Exp Med* 151: 501-516.
- 718 30. Maves, K. K., and J. M. Weiler. 1992. Detection of properdin mRNA in human peripheral  
719 blood monocytes and spleen. *J Lab Clin Med* 120: 762-766.
- 720 31. Fukuoka, Y., M. R. Hite, A. L. Dellinger, and L. B. Schwartz. 2013. Human skin mast  
721 cells express complement factors C3 and C5. *J Immunol* 191: 1827-1834.
- 722 32. van Schaarenburg, R. A., J. Suurmond, K. L. Habets, M. C. Brouwer, D. Wouters, F. A.  
723 Kurreeman, T. W. Huizinga, R. E. Toes, and L. A. Trouw. 2016. The production and  
724 secretion of complement component C1q by human mast cells. *Mol Immunol* 78: 164-  
725 170.
- 726 33. Ahrenstedt, O., L. Knutson, B. Nilsson, K. Nilsson-Ekdahl, B. Odling, and R. Hallgren.  
727 1990. Enhanced local production of complement components in the small intestines of  
728 patients with Crohn's disease. *N Engl J Med* 322: 1345-1349.
- 729 34. Laufer, J., R. Oren, I. Goldberg, A. Horwitz, J. Kopolovic, Y. Chowers, and J. H.  
730 Passwell. 2000. Cellular localization of complement C3 and C4 transcripts in intestinal  
731 specimens from patients with Crohn's disease. *Clin Exp Immunol* 120: 30-37.
- 732 35. Naughton, M. A., M. Botto, M. J. Carter, G. J. Alexander, J. M. Goldman, and M. J.  
733 Walport. 1996. Extrahepatic secreted complement C3 contributes to circulating C3 levels  
734 in humans. *The Journal of Immunology* 156: 3051.

- 735 36. Nonaka, M., and A. Kimura. 2006. Genomic view of the evolution of the complement  
736 system. *Immunogenetics* 58: 701-713.
- 737 37. The UniProt Consortium. 2017. UniProt: the universal protein knowledgebase. *Nucleic  
738 Acids Research* 45: D158-D169.
- 739 38. Hunt, S. E., W. McLaren, L. Gil, A. Thormann, H. Schuilenburg, D. Sheppard, A. Parton,  
740 I. M. Armean, S. J. Trevanion, P. Flicek, and F. Cunningham. 2018. Ensembl variation  
741 resources. *Database* 2018.
- 742 39. Vincent, W. J. B., C. M. Freisinger, P.-Y. Lam, A. Huttenlocher, and J.-D. Sauer. 2016.  
743 Macrophages mediate flagellin induced inflammasome activation and host defense in  
744 zebrafish. *Cellular microbiology* 18: 591-604.
- 745 40. Li, B., and C. N. Dewey. 2011. RSEM: accurate transcript quantification from RNA-Seq  
746 data with or without a reference genome. *BMC Bioinformatics* 12: 323.
- 747 41. Langmead, B., C. Trapnell, M. Pop, and S. L. Salzberg. 2009. Ultrafast and memory-  
748 efficient alignment of short DNA sequences to the human genome. *Genome Biology* 10:  
749 R25.
- 750 42. Love, M. I., W. Huber, and S. Anders. 2014. Moderated estimation of fold change and  
751 dispersion for RNA-seq data with DESeq2. *Genome Biology* 15: 550.
- 752 43. Subramanian, A., P. Tamayo, V. K. Mootha, S. Mukherjee, B. L. Ebert, M. A. Gillette, A.  
753 Paulovich, S. L. Pomeroy, T. R. Golub, E. S. Lander, and J. P. Mesirov. 2005. Gene set  
754 enrichment analysis: a knowledge-based approach for interpreting genome-wide  
755 expression profiles. *Proc Natl Acad Sci U S A* 102: 15545-15550.
- 756 44. Mootha, V. K., C. M. Lindgren, K.-F. Eriksson, A. Subramanian, S. Sihag, J. Lehar, P.  
757 Puigserver, E. Carlsson, M. Ridderstråle, E. Laurila, N. Houstis, M. J. Daly, N. Patterson,  
758 J. P. Mesirov, T. R. Golub, P. Tamayo, B. Spiegelman, E. S. Lander, J. N. Hirschhorn,  
759 D. Altshuler, and L. C. Groop. 2003. PGC-1 $\alpha$ -responsive genes involved in oxidative

- 760 phosphorylation are coordinately downregulated in human diabetes. *Nature Genetics* 34:  
761 267-273.
- 762 45. Liberzon, A., C. Birger, H. Thorvaldsdóttir, M. Ghandi, Jill P. Mesirov, and P. Tamayo.  
763 2015. The Molecular Signatures Database Hallmark Gene Set Collection. *Cell Systems*  
764 1: 417-425.
- 765 46. Hulsen, T., J. de Vlieg, and W. Alkema. 2008. BioVenn – a web application for the  
766 comparison and visualization of biological lists using area-proportional Venn diagrams.  
767 *BMC Genomics* 9: 488.
- 768 47. Livak, K. J., and T. D. Schmittgen. 2001. Analysis of relative gene expression data using  
769 real-time quantitative PCR and the 2<sup>-</sup>(Delta Delta C(T)) Method. *Methods* 25: 402-408.
- 770 48. Forn-Cuní, G., E. S. Reis, S. Dios, D. Posada, J. D. Lambris, A. Figueras, and B. Novoa.  
771 2014. The Evolution and Appearance of C3 Duplications in Fish Originate an Exclusive  
772 Teleost c3 Gene Form with Anti-Inflammatory Activity. *PLOS ONE* 9: e99673.
- 773 49. Mathias, J. R., M. E. Dodd, K. B. Walters, S. K. Yoo, E. A. Ranheim, and A.  
774 Huttenlocher. 2009. Characterization of zebrafish larval inflammatory macrophages.  
775 *Developmental and comparative immunology* 33: 1212-1217.
- 776 50. Powell, D., S. Tauzin, L. E. Hind, Q. Deng, D. J. Beebe, and A. Huttenlocher. 2017.  
777 Chemokine Signaling and the Regulation of Bidirectional Leukocyte Migration in  
778 Interstitial Tissues. *Cell Rep* 19: 1572-1585.
- 779 51. Deng, Q., Sa K. Yoo, Peter J. Cavnar, Julie M. Green, and A. Huttenlocher. 2011. Dual  
780 Roles for Rac2 in Neutrophil Motility and Active Retention in Zebrafish Hematopoietic  
781 Tissue. *Developmental Cell* 21: 735-745.
- 782 52. Harvie, E. A., and A. Huttenlocher. 2015. Non-invasive Imaging of the Innate Immune  
783 Response in a Zebrafish Larval Model of *Streptococcus iniae* Infection. *J Vis Exp*.
- 784 53. Levraud, J. P., E. Colucci-Guyon, M. J. Redd, G. Lutfalla, and P. Herbomel. 2008. In  
785 vivo analysis of zebrafish innate immunity. *Methods Mol Biol* 415: 337-363.

- 786 54. Yoo, S. K., and A. Huttenlocher. 2011. Spatiotemporal photolabeling of neutrophil  
787 trafficking during inflammation in live zebrafish. *Journal of leukocyte biology* 89: 661-667.
- 788 55. Huemer, K., J. M. Squirrell, R. Swader, D. C. LeBert, A. Huttenlocher, and K. W. Eliceiri.  
789 2017. zWEDGI: Wounding and Entrapment Device for Imaging Live Zebrafish Larvae.  
790 *Zebrafish* 14: 42-50.
- 791 56. Yoo, S. K., Q. Deng, P. J. Cavnar, Y. I. Wu, K. M. Hahn, and A. Huttenlocher. 2010.  
792 Differential regulation of protrusion and polarity by PI3K during neutrophil motility in live  
793 zebrafish. *Dev Cell* 18: 226-236.
- 794 57. Barros-Becker, F., P. Y. Lam, R. Fisher, and A. Huttenlocher. 2017. Live imaging reveals  
795 distinct modes of neutrophil and macrophage migration within interstitial tissues. *J Cell*  
796 *Sci* 130: 3801-3808.
- 797 58. Yamahashi, Y., P. J. Cavnar, L. E. Hind, E. Berthier, D. A. Bennin, D. Beebe, and A.  
798 Huttenlocher. 2015. Integrin associated proteins differentially regulate neutrophil polarity  
799 and directed migration in 2D and 3D. *Biomed Microdevices* 17: 100.
- 800 59. Warrick, J. W., A. Timm, A. Swick, and J. Yin. 2016. Tools for Single-Cell Kinetic  
801 Analysis of Virus-Host Interactions. *PLOS ONE* 11: e0145081.
- 802 60. Roehl, H. H. 2018. Linking wound response and inflammation to regeneration in the  
803 zebrafish larval fin. *Int J Dev Biol* 62: 473-477.
- 804 61. Kettleborough, R. N. W., E. M. Busch-Nentwich, S. A. Harvey, C. M. Dooley, E. de  
805 Bruijn, F. van Eeden, I. Sealy, R. J. White, C. Herd, I. J. Nijman, F. Fényes, S. Mehroke,  
806 C. Scahill, R. Gibbons, N. Wali, S. Carruthers, A. Hall, J. Yen, E. Cuppen, and D. L.  
807 Stemple. 2013. A systematic genome-wide analysis of zebrafish protein-coding gene  
808 function. *Nature* 496: 494-497.
- 809 62. El-Gebali, S., J. Mistry, A. Bateman, S. R. Eddy, A. Luciani, S. C. Potter, M. Qureshi, L.  
810 J. Richardson, G. A. Salazar, A. Smart, E. L. L. Sonnhammer, L. Hirsh, L. Paladin, D.

- 811 Piovesan, S. C E. Tosatto, and R. D. Finn. 2018. The Pfam protein families database in  
812 2019. *Nucleic Acids Research* 47: D427-D432.
- 813 63. Walport, M. J. 2001. Complement. *New England Journal of Medicine* 344: 1058-1066.
- 814 64. Deng, Q., E. A. Harvie, and A. Huttenlocher. 2012. Distinct signalling mechanisms  
815 mediate neutrophil attraction to bacterial infection and tissue injury. *Cell Microbiol* 14:  
816 517-528.
- 817 65. Koh, A. Y., G. P. Priebe, C. Ray, N. Van Rooijen, and G. B. Pier. 2009. Inescapable  
818 Need for Neutrophils as Mediators of Cellular Innate Immunity to Acute  
819 *Pseudomonas aeruginosa* Pneumonia. *Infection and Immunity* 77: 5300.
- 820 66. Nordahl, E. A., V. Rydengard, P. Nyberg, D. P. Nitsche, M. Morgelin, M. Malmsten, L.  
821 Bjorck, and A. Schmidtchen. 2004. Activation of the complement system generates  
822 antibacterial peptides. *Proc Natl Acad Sci U S A* 101: 16879-16884.
- 823 67. Le Guyader, D., M. J. Redd, E. Colucci-Guyon, E. Murayama, K. Kissa, V. Briolat, E.  
824 Mordelet, A. Zapata, H. Shinomiya, and P. Herbomel. 2008. Origins and unconventional  
825 behavior of neutrophils in developing zebrafish. *Blood* 111: 132-141.
- 826 68. Reca, R., D. Mastellos, M. Majka, L. Marquez, J. Ratajczak, S. Franchini, A. Glodek, M.  
827 Honczarenko, L. A. Spruce, A. Janowska-Wieczorek, J. D. Lambris, and M. Z.  
828 Ratajczak. 2003. Functional receptor for C3a anaphylatoxin is expressed by normal  
829 hematopoietic stem/progenitor cells, and C3a enhances their homing-related responses  
830 to SDF-1. *Blood* 101: 3784-3793.
- 831 69. Honczarenko, M., M. Z. Ratajczak, A. Nicholson-Weller, and L. E. Silberstein. 2005.  
832 Complement C3a Enhances CXCL12 (SDF-1)-Mediated Chemotaxis of Bone Marrow  
833 Hematopoietic Cells Independently of C3a Receptor. *The Journal of Immunology* 175:  
834 3698.
- 835 70. Ratajczak, J., R. Reca, M. Kucia, M. Majka, D. J. Allendorf, J. T. Baran, A. Janowska-  
836 Wieczorek, R. A. Wetsel, G. D. Ross, and M. Z. Ratajczak. 2004. Mobilization studies in

- 837 mice deficient in either C3 or C3a receptor (C3aR) reveal a novel role for complement in  
838 retention of hematopoietic stem/progenitor cells in bone marrow. *Blood* 103: 2071-2078.
- 839 71. Murayama, E., K. Kissa, A. Zapata, E. Mordelet, V. Briolat, H.-F. Lin, R. I. Handin, and  
840 P. Herbomel. 2006. Tracing Hematopoietic Precursor Migration to Successive  
841 Hematopoietic Organs during Zebrafish Development. *Immunity* 25: 963-975.
- 842 72. Ehrenguber, M. U., T. Geiser, and D. A. Deranleau. 1994. Activation of human  
843 neutrophils by C3a and C5A. Comparison of the effects on shape changes, chemotaxis,  
844 secretion, and respiratory burst. *FEBS Lett* 346: 181-184.
- 845 73. Klos, A., A. J. Tenner, K.-O. Johswich, R. R. Ager, E. S. Reis, and J. Köhl. 2009. The  
846 role of the anaphylatoxins in health and disease. *Molecular immunology* 46: 2753-2766.
- 847 74. Fernandez, H. N., P. M. Henson, A. Otani, and T. E. Hugli. 1978. Chemotactic Response  
848 to Human C3a and C5a Anaphylatoxins. *The Journal of Immunology* 120: 109.
- 849 75. Daffern, P. J., P. H. Pfeifer, J. A. Ember, and T. E. Hugli. 1995. C3a is a chemotaxin for  
850 human eosinophils but not for neutrophils. I. C3a stimulation of neutrophils is secondary  
851 to eosinophil activation. *The Journal of experimental medicine* 181: 2119-2127.
- 852 76. Kobayashi, Y. 2008. The role of chemokines in neutrophil biology. *Front Biosci* 13: 2400-  
853 2407.
- 854 77. de Oliveira, S., C. C. Reyes-Aldasoro, S. Candel, S. A. Renshaw, V. Mulero, and Â.  
855 Calado. 2013. Cxcl8 (IL-8) Mediates Neutrophil Recruitment and Behavior in the  
856 Zebrafish Inflammatory Response. *The Journal of Immunology* 190: 4349.
- 857 78. Rennekampff, H. O., J. F. Hansbrough, V. Kiessig, C. Dore, M. Sticherling, and J. M.  
858 Schroder. 2000. Bioactive interleukin-8 is expressed in wounds and enhances wound  
859 healing. *J Surg Res* 93: 41-54.
- 860 79. Roupe, K. M., M. Nybo, U. Sjobring, P. Alberius, A. Schmidtchen, and O. E. Sorensen.  
861 2010. Injury is a major inducer of epidermal innate immune responses during wound  
862 healing. *J Invest Dermatol* 130: 1167-1177.



- 863 80. Deng, Q., E. A. Harvie, and A. Huttenlocher. 2012. Distinct signalling mechanisms  
864 mediate neutrophil attraction to bacterial infection and tissue injury. *Cellular microbiology*  
865 14: 517-528.
- 866 81. Na, M., A. Jarneborn, A. Ali, A. Welin, M. Magnusson, A. Stokowska, M. Pekna, and T.  
867 Jin. 2016. Deficiency of the Complement Component 3 but Not Factor B Aggravates  
868 *Staphylococcus aureus* Septic Arthritis in Mice. *Infect Immun* 84: 930-939.
- 869 82. Shao, Z., T. Nishimura, L. L. Leung, and J. Morser. 2015. Carboxypeptidase B2  
870 deficiency reveals opposite effects of complement C3a and C5a in a murine  
871 polymicrobial sepsis model. *J Thromb Haemost* 13: 1090-1102.
- 872 83. Markiewski, M. M., D. Mastellos, R. Tudoran, R. A. DeAngelis, C. W. Strey, S. Franchini,  
873 R. A. Wetsel, A. Erdei, and J. D. Lambris. 2004. C3a and C3b Activation Products of the  
874 Third Component of Complement (C3) Are Critical for Normal Liver Recovery after Toxic  
875 Injury. *The Journal of Immunology* 173: 747.
- 876 84. Maeno, Y., Y. Mori, M. Iwasa, H. Inoue, and F. Takabe. 1992. Complement component  
877 C3a or C3a desArg as a new marker for estimation of local vital reactions in incised skin  
878 wounds. *Forensic Science International* 55: 37-44.
- 879 85. Rafail, S., I. Kourtzelis, P. G. Foukas, M. M. Markiewski, R. A. DeAngelis, M. Guariento,  
880 D. Ricklin, E. A. Grice, and J. D. Lambris. 2015. Complement Deficiency Promotes  
881 Cutaneous Wound Healing in Mice. *The Journal of Immunology* 194: 1285.
- 882 86. Hugli, T. E. 1975. Human anaphylatoxin (C3a) from the third component of complement.  
883 Primary structure. *J Biol Chem* 250: 8293-8301.
- 884 87. Paiano, J., M. Harland, M. G. Strainic, J. Nedrud, W. Hussain, and M. E. Medof. 2019.  
885 Follicular B2 Cell Activation and Class Switch Recombination Depend on Autocrine  
886 C3ar1/C5ar1 Signaling in B2 Cells. *J Immunol* 203: 379-388.

- 887 88. Martin, U., D. Bock, L. Arseniev, M. A. Tornetta, R. S. Ames, W. Bautsch, J. Kohl, A.  
888 Ganser, and A. Klos. 1997. The human C3a receptor is expressed on neutrophils and  
889 monocytes, but not on B or T lymphocytes. *J Exp Med* 186: 199-207.
- 890 89. Sengelov, H. 1995. Complement receptors in neutrophils. *Crit Rev Immunol* 15: 107-  
891 131.
- 892 90. Camous, L., L. Roumenina, S. Bigot, S. Brachemi, V. Frémeaux-Bacchi, P. Lesavre, and  
893 L. Halbwachs-Mecarelli. 2011. Complement alternative pathway acts as a positive  
894 feedback amplification of neutrophil activation. *Blood* 117: 1340-1349.
- 895

Figure 1

A

| Transgenic zebrafish line | Cell type labeled                                                                             |
|---------------------------|-----------------------------------------------------------------------------------------------|
| <i>lyz:L10a-EGFP</i>      | Neutrophils  |
| <i>mpeg1:L10a-EGFP</i>    | Macrophages  |
| <i>krt4:L10a-EGFP</i>     | Epithelium   |

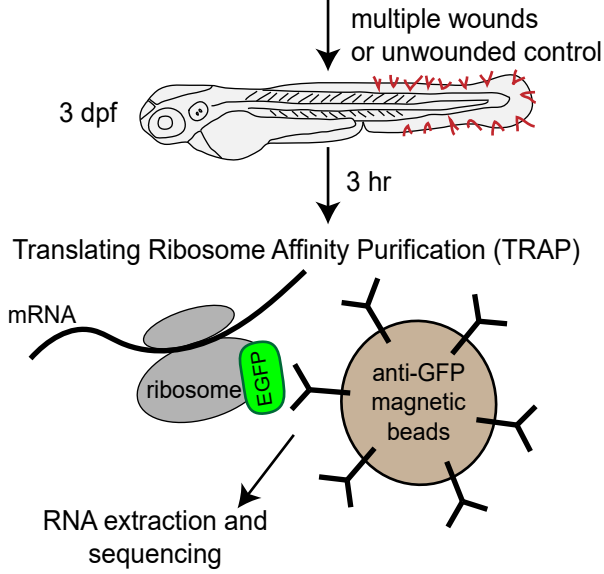

B

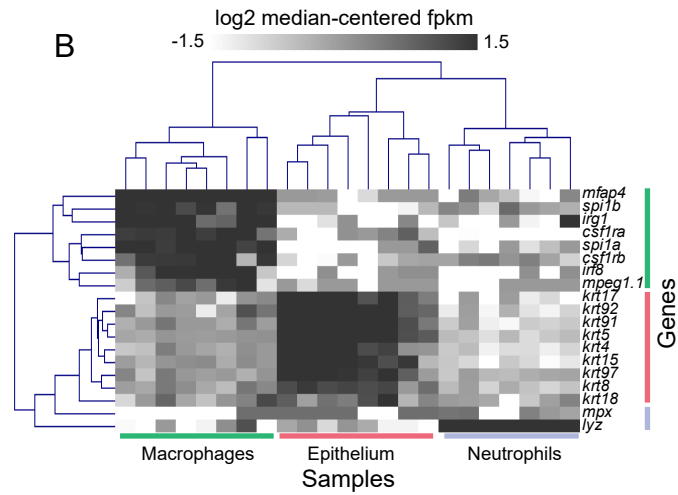

C

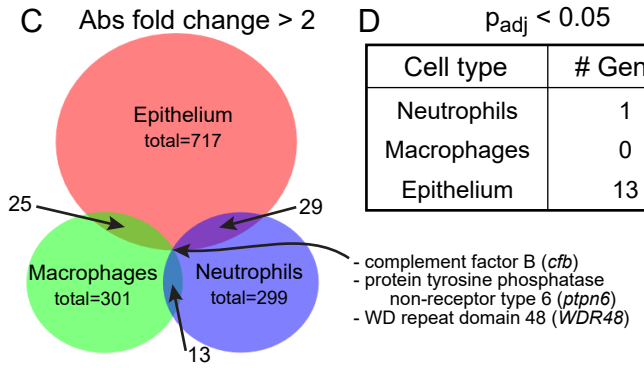

D

$p_{adj} < 0.05$

| Cell type   | # Genes |
|-------------|---------|
| Neutrophils | 1       |
| Macrophages | 0       |
| Epithelium  | 13      |

- complement factor B (*cfb*)
- protein tyrosine phosphatase non-receptor type 6 (*ptpn6*)
- WD repeat domain 48 (*WDR48*)

Figure 2

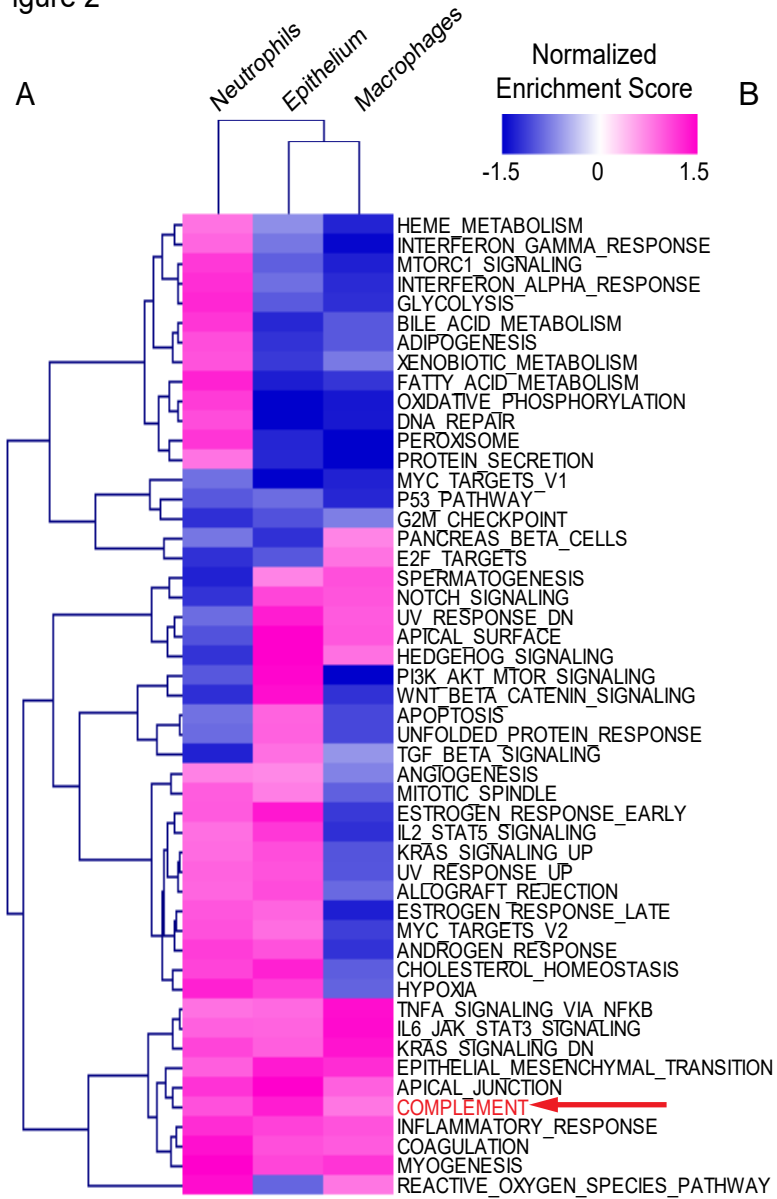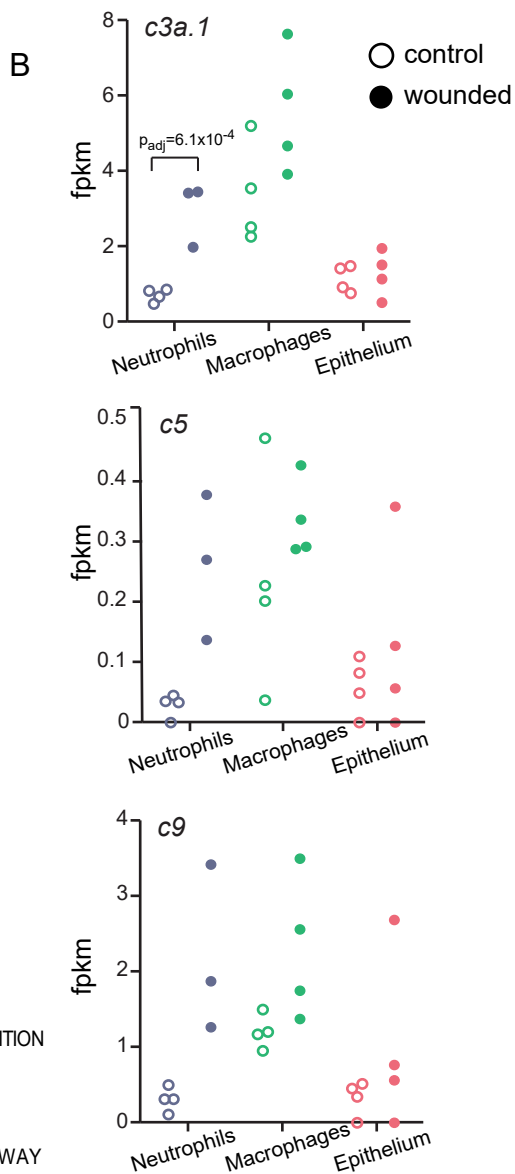

Figure 3

A

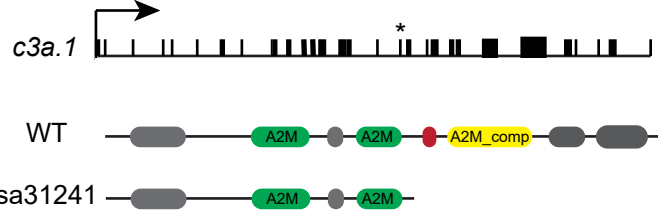

B

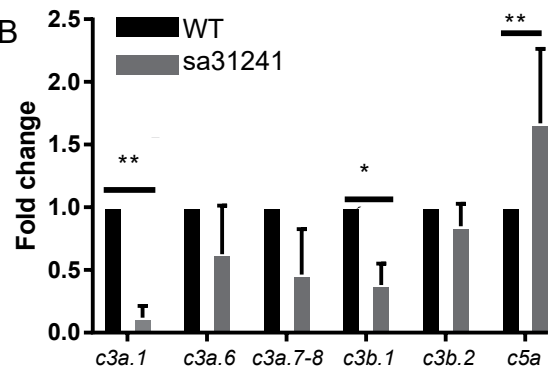

C

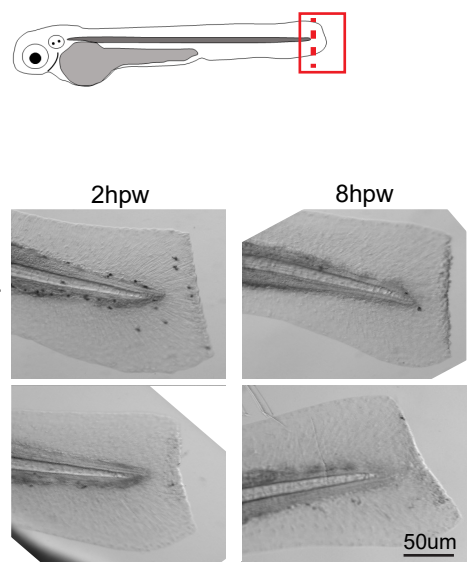

D

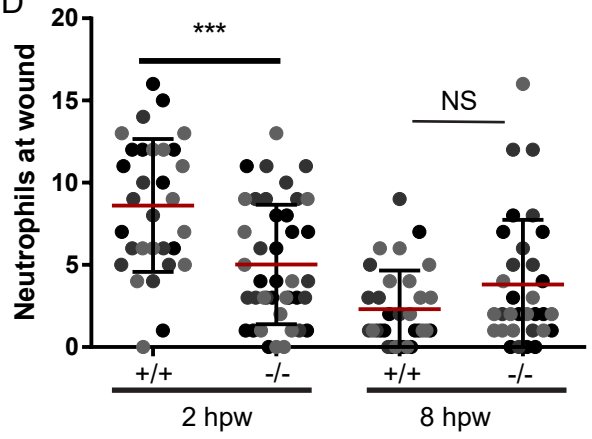

E

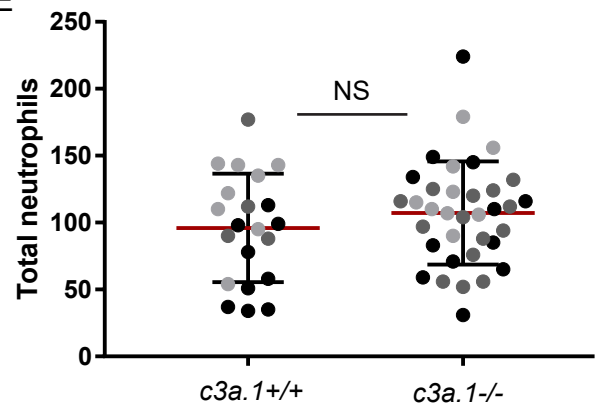

Figure 4

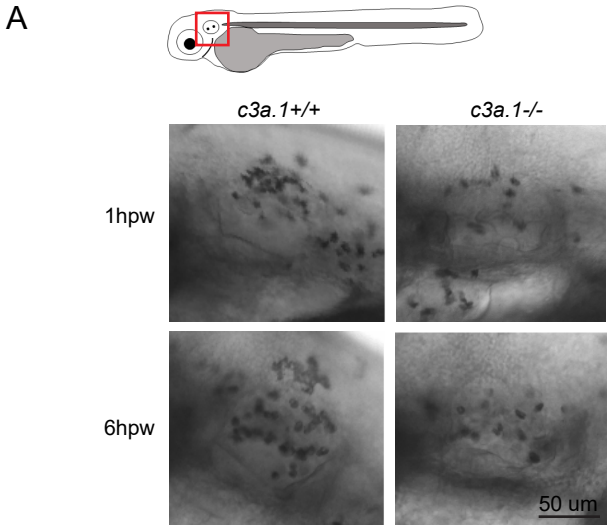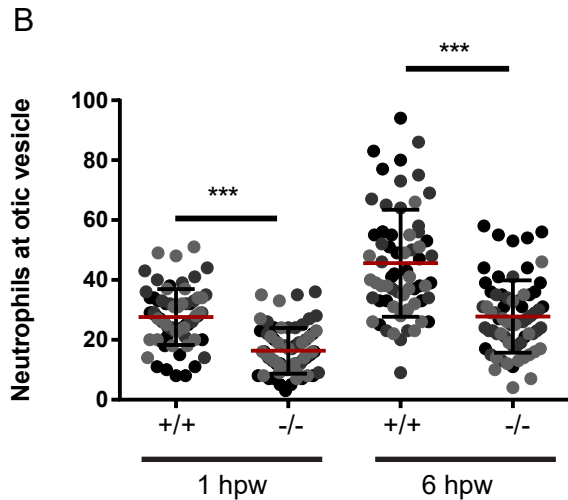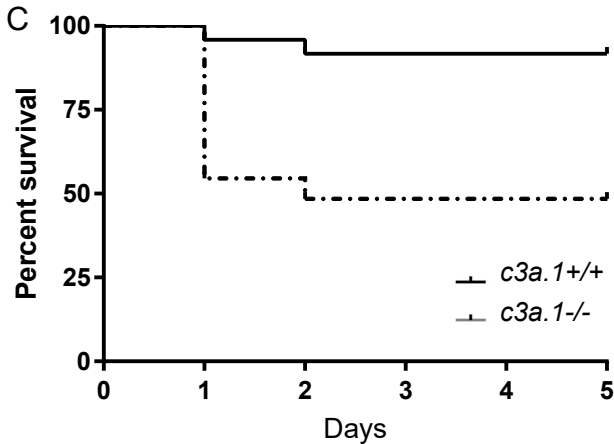

| Comparison                                                  | P value | Hazard Ratio |
|-------------------------------------------------------------|---------|--------------|
| <i>c3a.1</i> <sup>+/+</sup> vs. <i>c3a.1</i> <sup>-/-</sup> | 0.00022 | 11.091       |

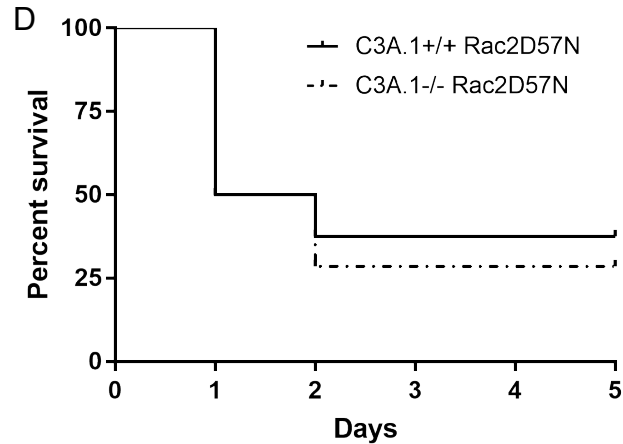

| Comparison                                                  | P value | Hazard Ratio |
|-------------------------------------------------------------|---------|--------------|
| <i>c3a.1</i> <sup>+/+</sup> vs. <i>c3a.1</i> <sup>-/-</sup> | 0.68    | 1.236        |

Figure 5

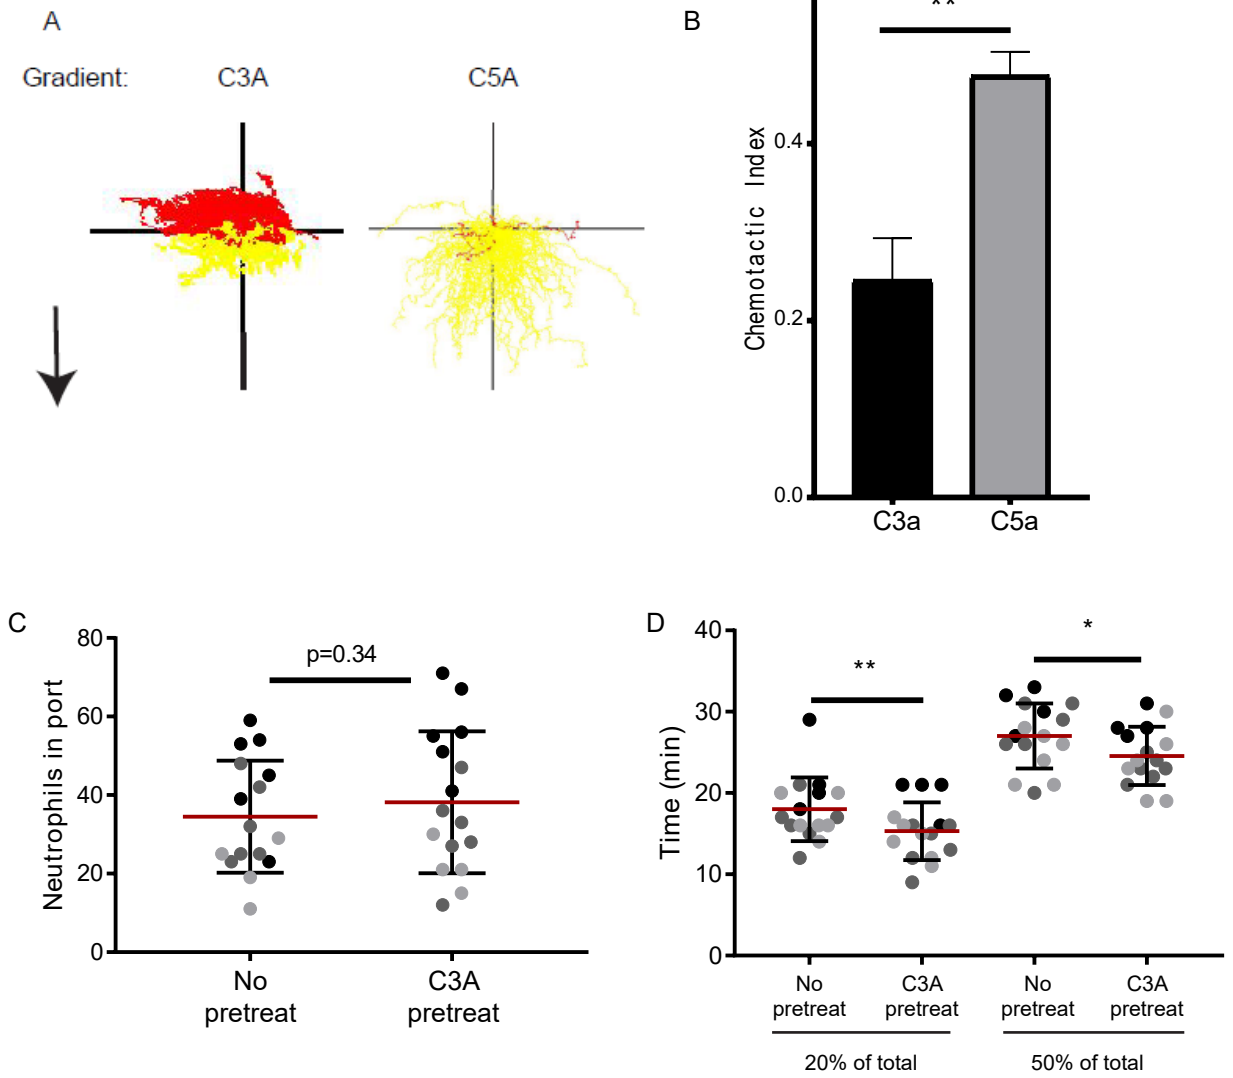

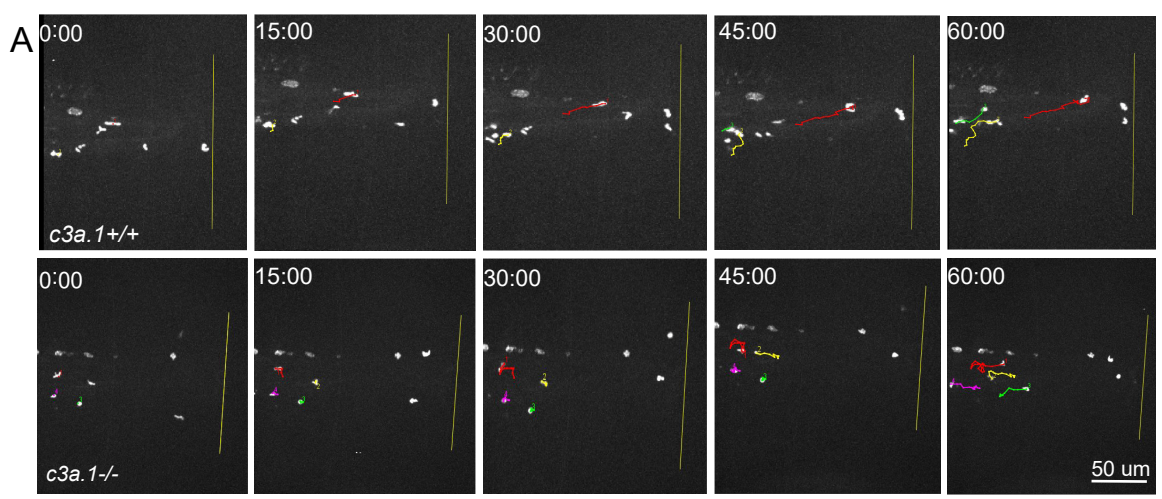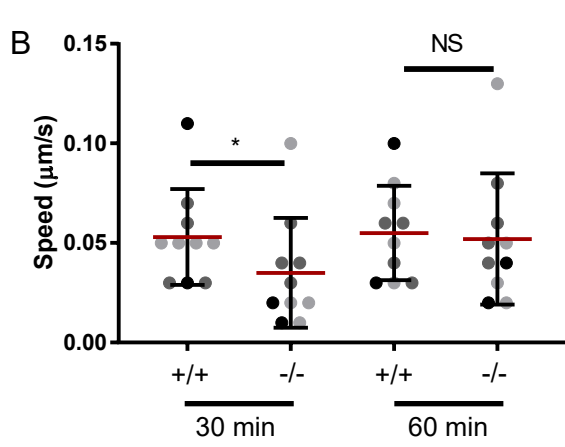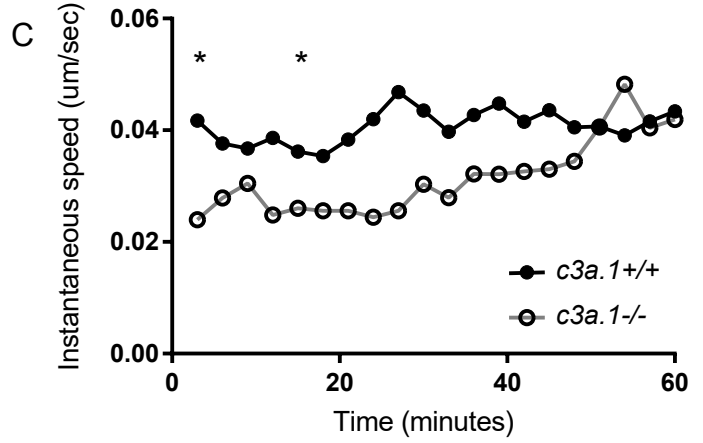

**D**

| Time (min.) | Speed ( $\mu$ m/sec)         |                              | fold change                  | <i>p</i> -value |
|-------------|------------------------------|------------------------------|------------------------------|-----------------|
|             | <i>c3a.1</i> <sup>+/+</sup>  | <i>c3a.1</i> <sup>-/-</sup>  |                              |                 |
| 3           | 0.017-0.029 <sub>0.049</sub> | 0.010-0.017 <sub>0.029</sub> | 0.396-0.591 <sub>0.881</sub> | 0.010           |
| 15          | 0.016-0.028 <sub>0.048</sub> | 0.011-0.018 <sub>0.032</sub> | 0.481-0.668 <sub>0.929</sub> | 0.017           |
| 30          | 0.015-0.026 <sub>0.046</sub> | 0.012-0.020 <sub>0.036</sub> | 0.584-0.780 <sub>1.041</sub> | 0.091           |
| 45          | 0.014-0.025 <sub>0.043</sub> | 0.013-0.023 <sub>0.039</sub> | 0.660-0.910 <sub>1.254</sub> | 0.562           |
